# Supplementary material for: Regioselective carboannulation of electron-deficient allenes with dialkyl (2-formylphenyl)malonates leading to multisubstituted naphthalenes
Source: Royal Society of Chemistry journal article supplement (doi:10.1039/c6ob00787b), 2016-01-01
Supplement: c6ob00787b1.pdf [file c6ob00787b1.pdf]

## Supplementary Information

### Regioselective carboannulation of electron-deficient allenes with dialkyl (2-formylphenyl)malonates leading to multisubstituted naphthalenes

Nagaraju Koppanathi and K. C. Kumara Swamy\*

School of Chemistry, University of Hyderabad, Hyderabad 500 046, Telangana, India.

E-mail: [kckssc@uohyd.ac.in](mailto:kckssc@uohyd.ac.in); kckssc@yahoo.com

|          |                                                                                  |               |
|----------|----------------------------------------------------------------------------------|---------------|
| <b>1</b> | <b>General procedure for the synthesis compounds 1 and 2</b>                     | <b>S1</b>     |
| <b>2</b> | <b>Copies of <math>^1\text{H}/^{13}\text{C}/^{31}\text{P}</math> NMR Spectra</b> | <b>S2-S83</b> |

**General procedure for the synthesis of carboxylic acid precursors to 1j and 1k:**

Compounds 2-(1,3-diisopropoxy-1,3-dioxopropan-2-yl)benzoic acid and 2-(1,3-di-*tert*-butoxy-1,3-dioxopropan-2-yl)benzoic acid were prepared by a literature procedure.<sup>11b</sup>

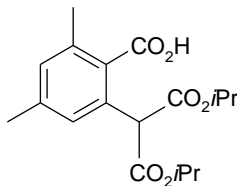

**2-(1,3-Diisopropoxy-1,3-dioxopropan-2-yl)benzoic acid (precursor to 1j).** Yield 1.5 g (using 6.66 mmol of 2,4-dimethylbenzoic acid), 67% (white solid): mp 150-152 °C; IR (KBr, cm<sup>-1</sup>) 2981, 1731, 1611, 1375, 1178, 1101, 1025, 833, 731; <sup>1</sup>H NMR (400 MHz, CDCl<sub>3</sub>) δ 7.15 (s, 1H), 7.08 (s, 1H), 5.18-5.08 (m, 2H), 4.97 (s, 1H), 2.48 (s, 3H), 2.37 (s, 3H), 1.30 (d, *J* = 6.2 Hz, 6H), 1.27 (d, *J* = 6.2 Hz, 6H); <sup>13</sup>C NMR (100 MHz, CDCl<sub>3</sub>) δ 172.2, 167.9, 140.8, 137.4, 131.9, 131.6, 129.1, 127.9, 69.6, 56.0, 21.6, 21.5, 21.3, 21.0; HRMS (ESI) Calcd. for C<sub>18</sub>H<sub>24</sub>O<sub>6</sub>Na [M<sup>+</sup>+Na]: *m/z* 359.1471. Found: 359.1474.

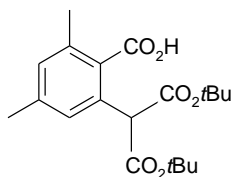

**2-(1,3-Di-*tert*-butoxy-1,3-dioxopropan-2-yl)benzoic acid (precursor to 1k).** Yield 1.6 g (using 6.66 mmol of 2,4-dimethylbenzoic acid), 66% (white gummy solid): IR (neat, cm<sup>-1</sup>) 2981, 1731, 1616, 1457, 1375, 1299, 1129, 1036, 855, 734; <sup>1</sup>H NMR (400 MHz, CDCl<sub>3</sub>) δ 7.17 (s, 1H), 7.06 (s, 1H), 4.87 (s, 1H), 2.48 (s, 3H), 2.37 (s, 3H), 1.5 (s, 18H); <sup>13</sup>C NMR (100 MHz, CDCl<sub>3</sub>) δ 173.3, 167.8, 140.7, 137.4, 132.6, 131.4, 129.2, 127.7, 82.4, 57.6, 27.9, 21.4, 21.1; HRMS (ESI) Calcd. for C<sub>20</sub>H<sub>29</sub>O<sub>6</sub> [M<sup>+</sup>+H]: *m/z* 365.1964. Found: 365.1959.

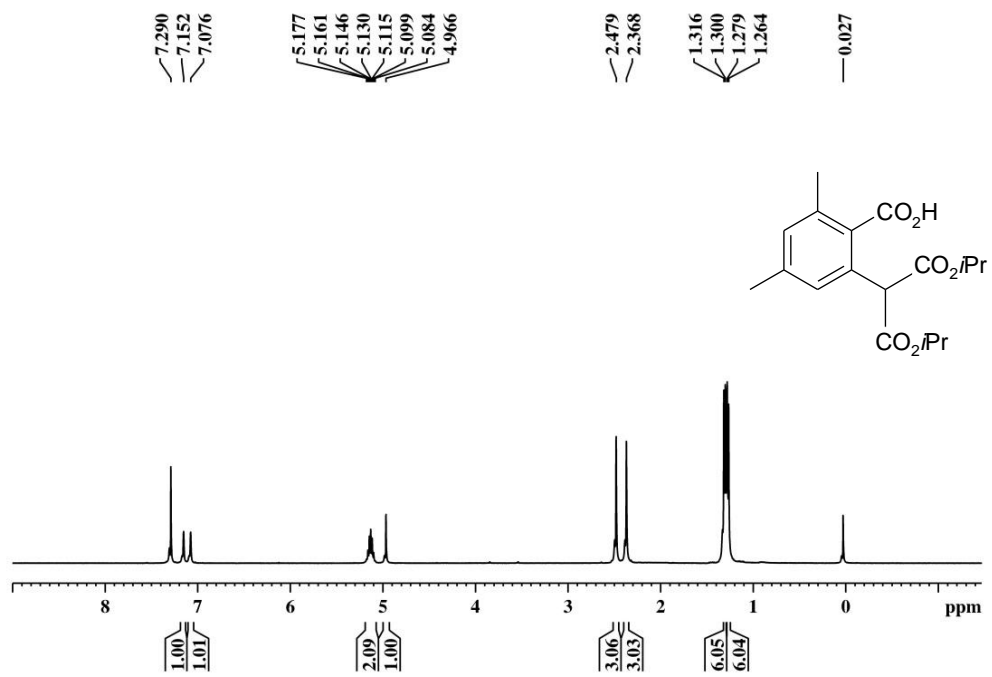

Figure S2. <sup>1</sup>H NMR spectrum of compound 163

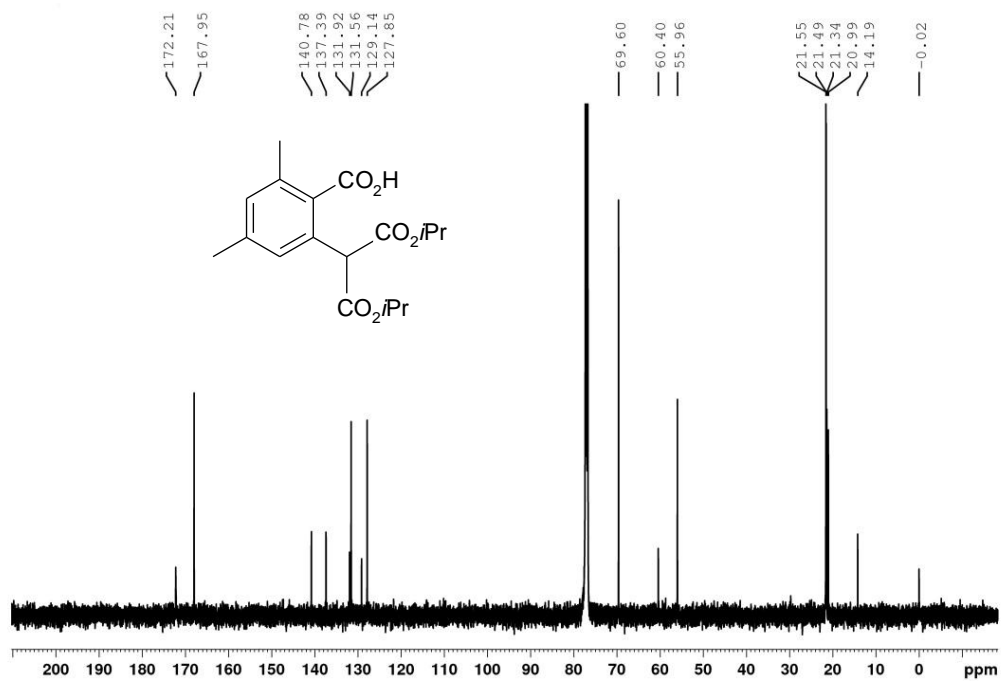

Figure S3.  $^{13}\text{C}$  NMR spectrum of compound 163

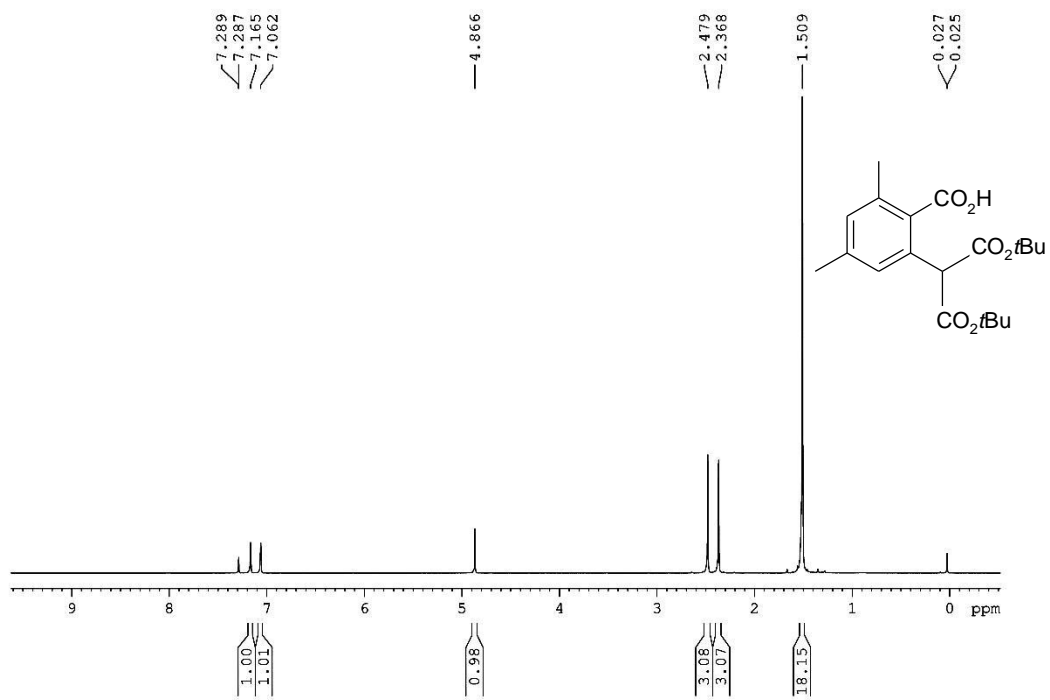

Figure S4.  $^1\text{H}$  NMR spectrum of compound 164

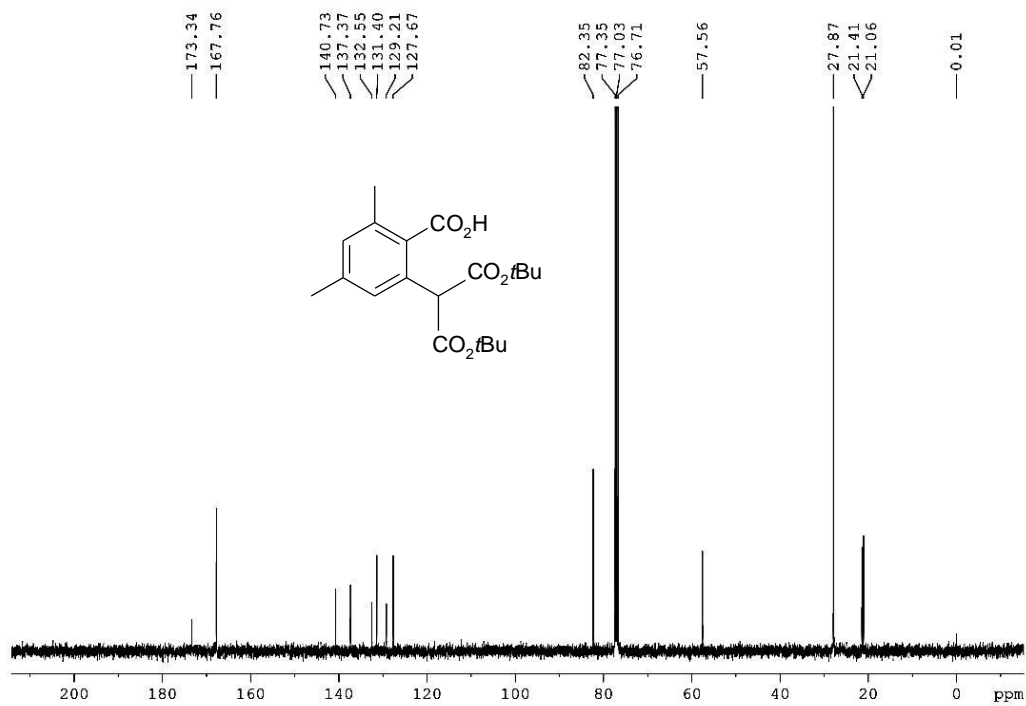

Figure S5.  $^{13}\text{C}$  NMR spectrum of compound 164

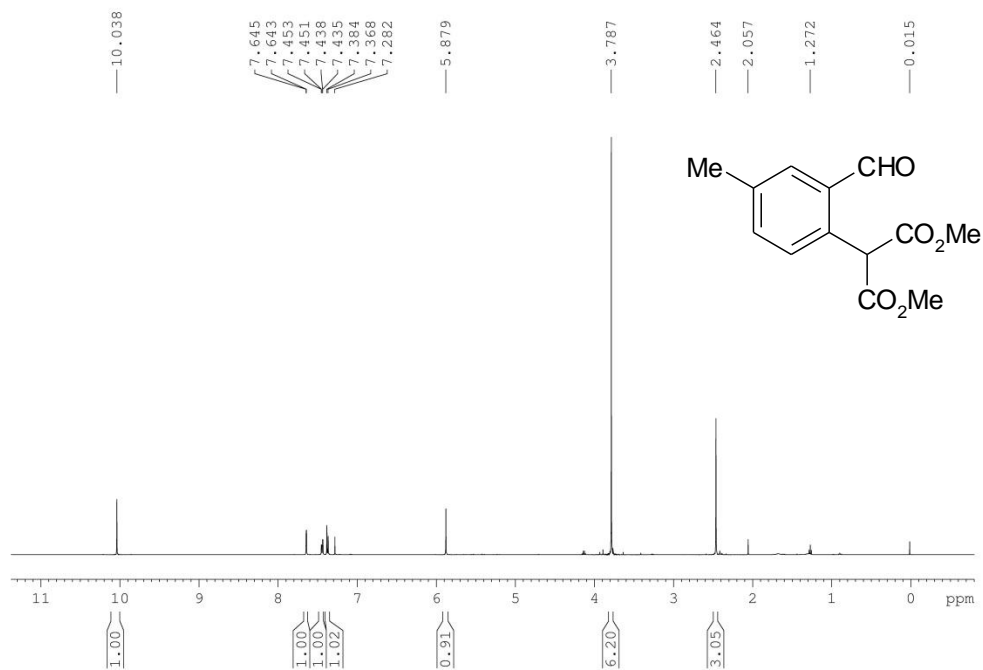

Figure S6.  $^1\text{H}$  NMR spectrum of compound 1b

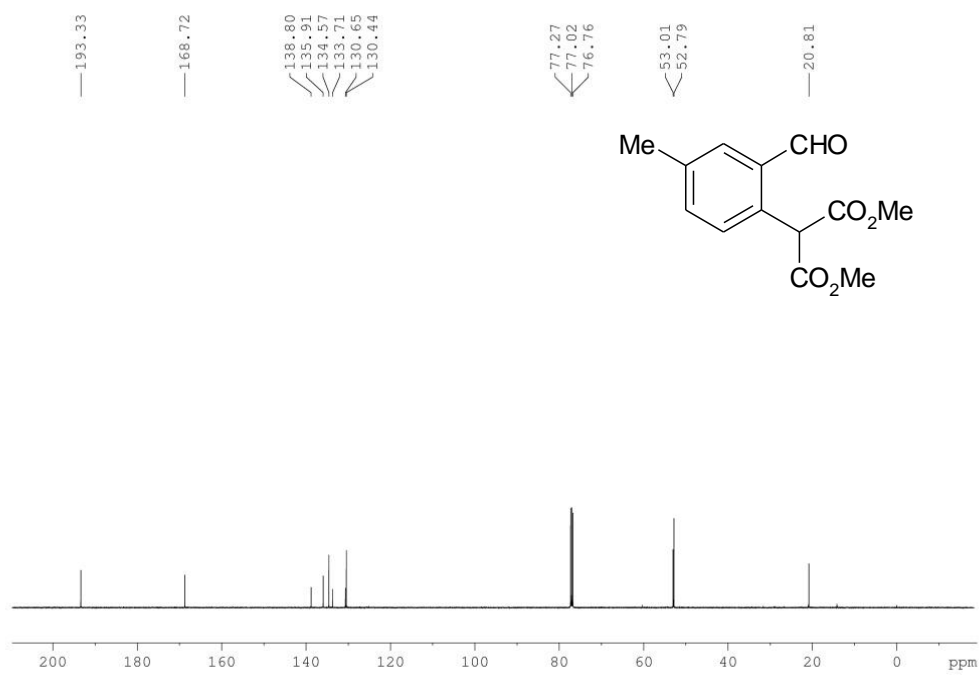

**Figure S7.**  $^{13}\text{C}$  NMR spectrum of compound **1b**

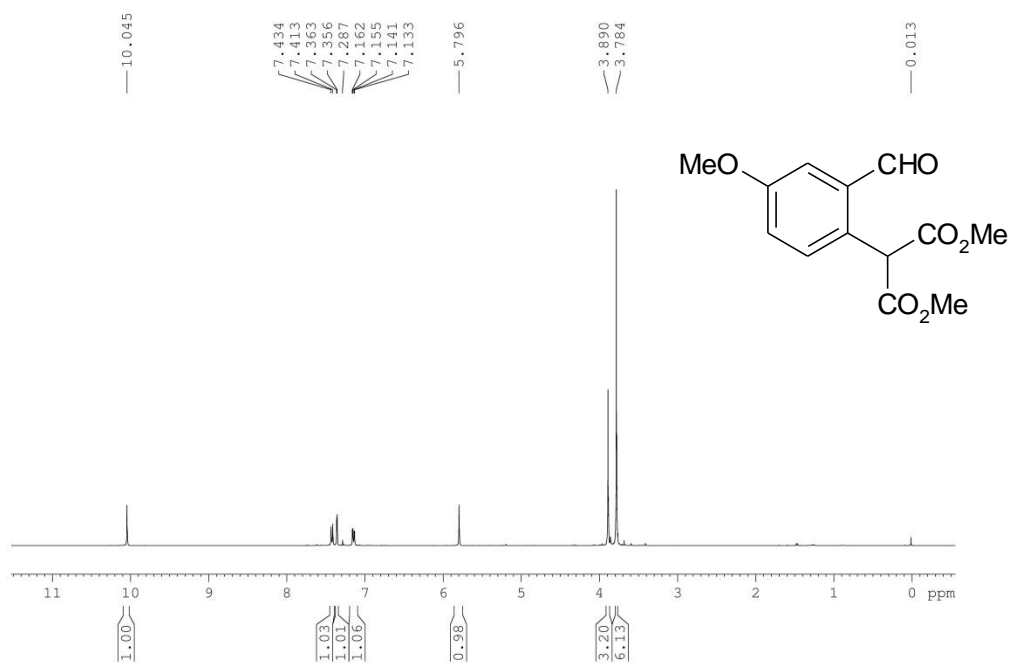

**Figure S8.**  $^1\text{H}$  NMR spectrum of compound **1c**

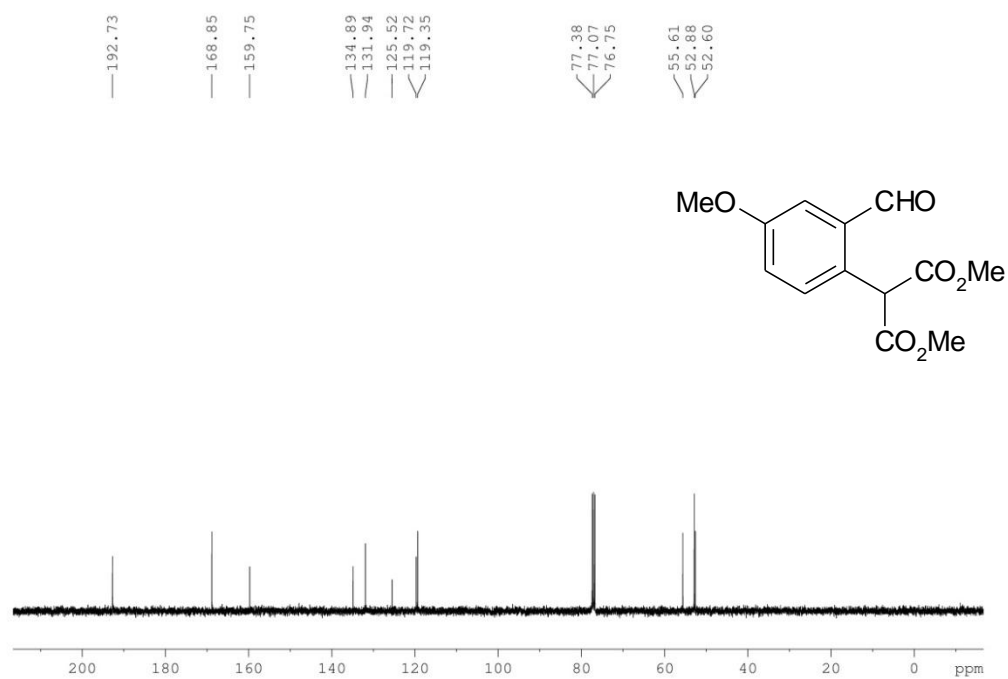

**Figure S9.**  $^{13}\text{C}$  NMR spectrum of compound **1c**

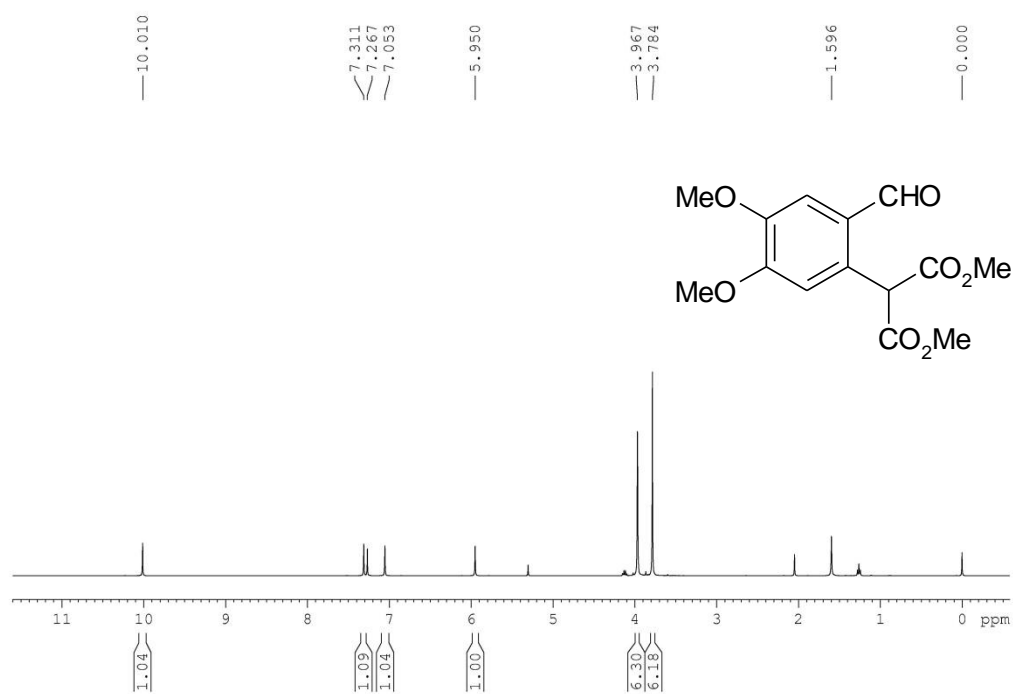

**Figure S10.**  $^1\text{H}$  NMR spectrum of compound **1d**

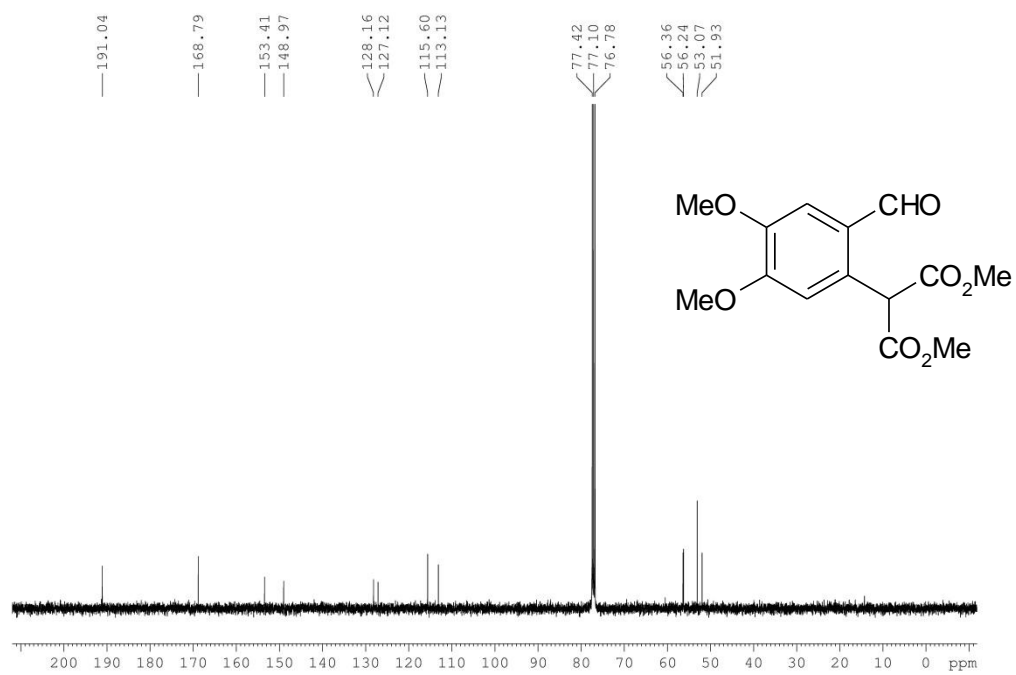

Figure S11.  $^{13}\text{C}$  NMR spectrum of compound **1d**

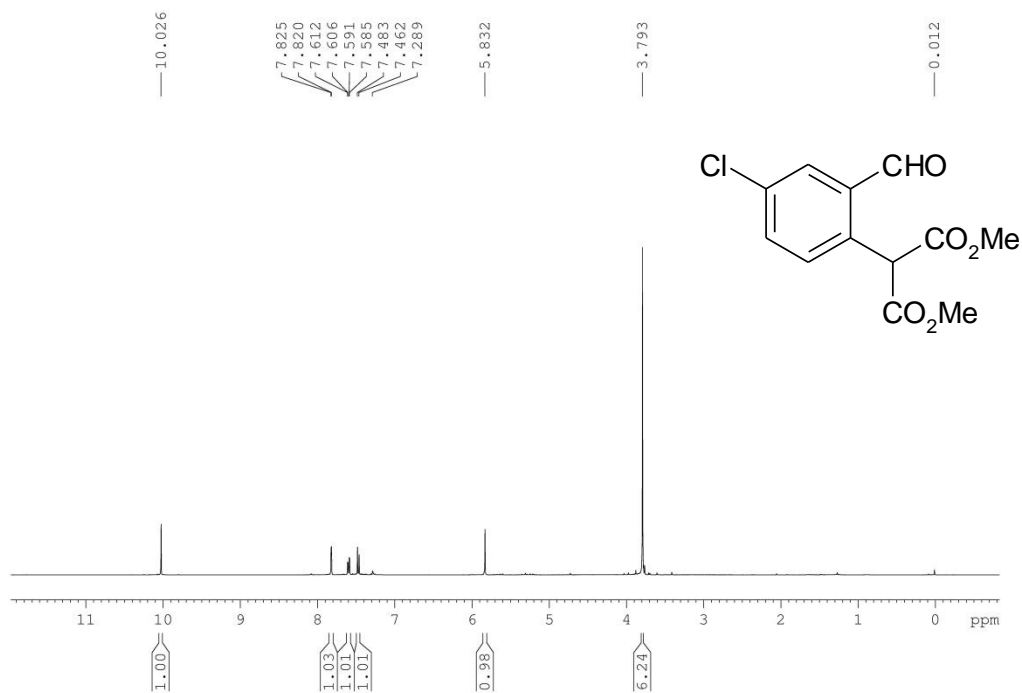

Figure S12.  $^1\text{H}$  NMR spectrum of compound **1e**



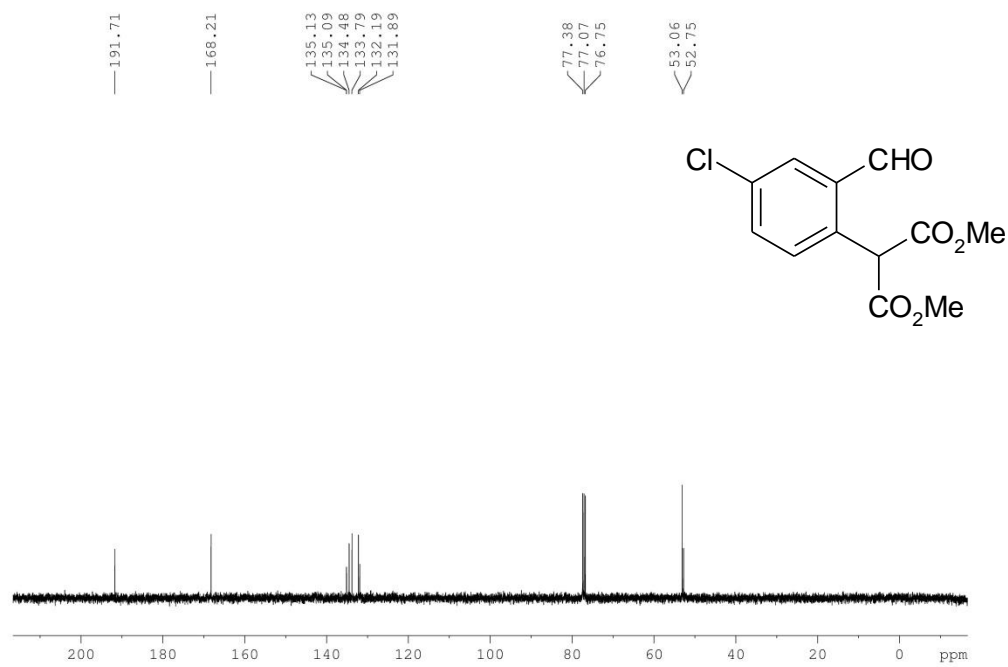

**Figure S13.**  $^{13}\text{C}$  NMR spectrum of compound **1e**

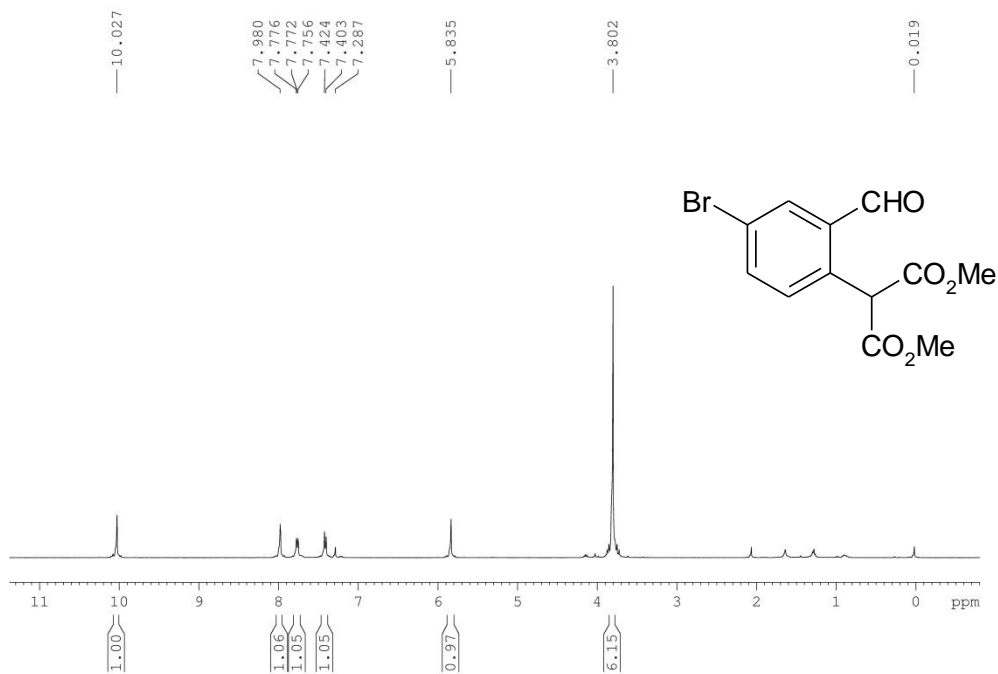

**Figure S14.**  $^{13}\text{C}$  NMR spectrum of compound **1f**

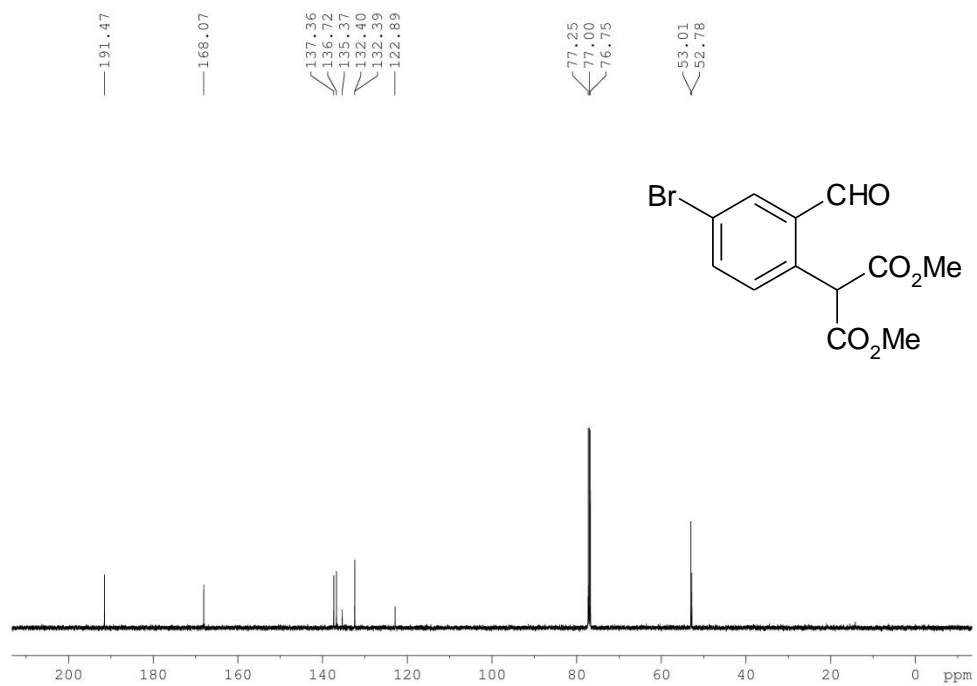

**Figure S15.**  $^{13}\text{C}$  NMR spectrum of compound **1f**

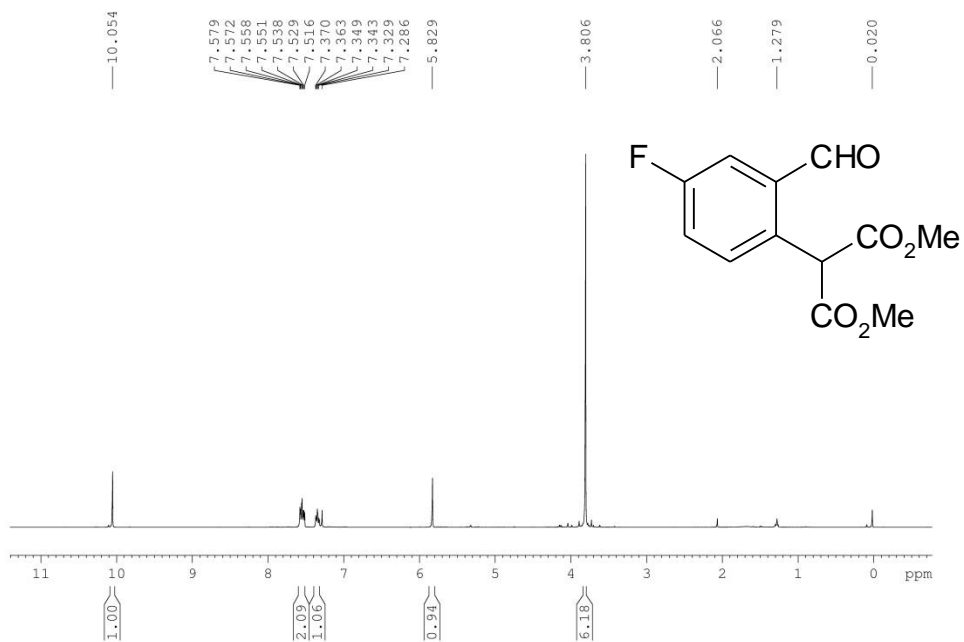

**Figure S16.**  $^{13}\text{C}$  NMR spectrum of compound **1g**

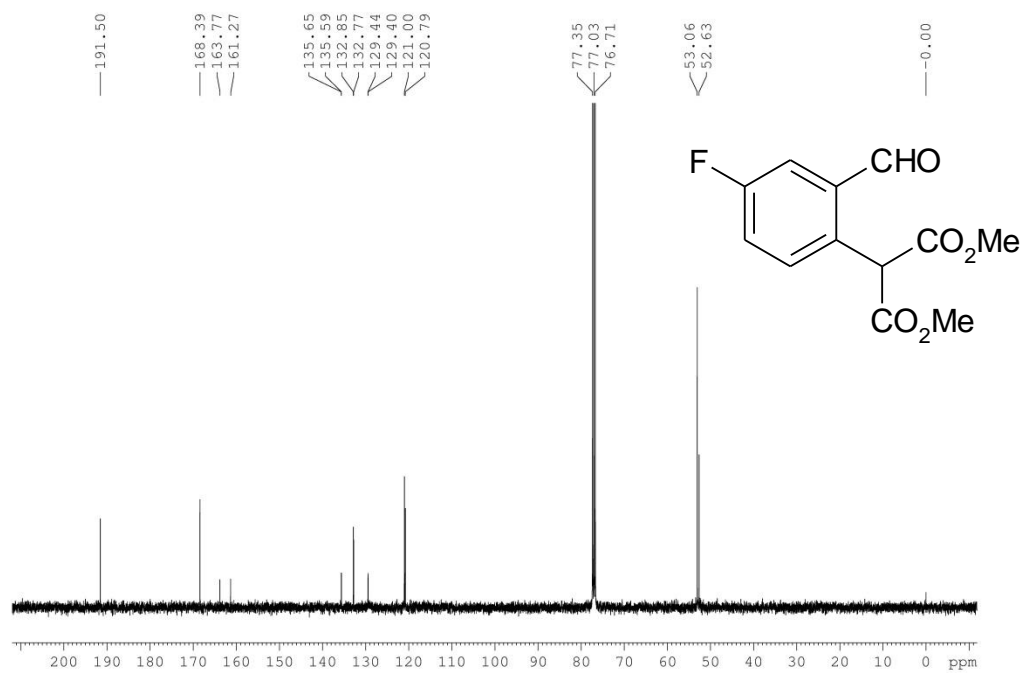

**Figure S17.**  $^{13}\text{C}$  NMR spectrum of compound **1g**

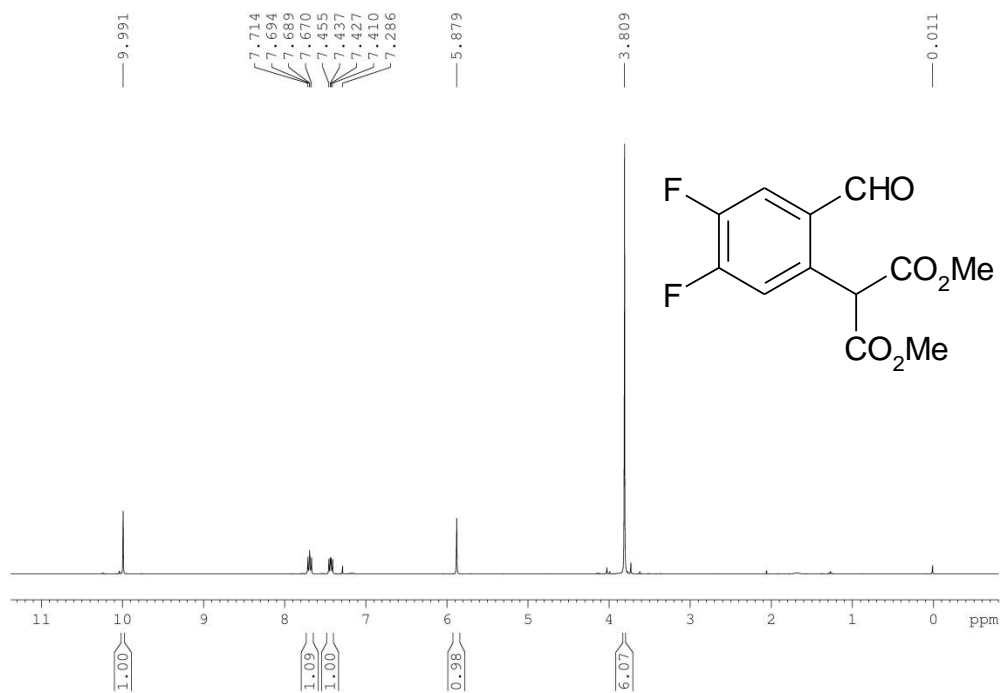

**Figure S18.**  $^1\text{H}$  NMR spectrum of compound **1h**

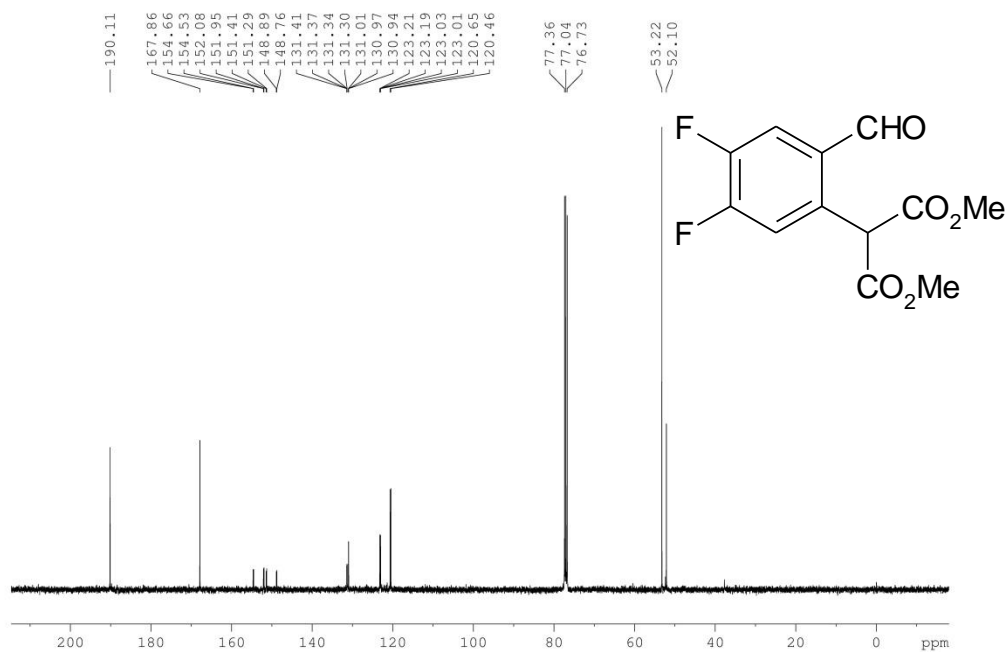

Figure S19. <sup>13</sup>C NMR spectrum of compound **1h**

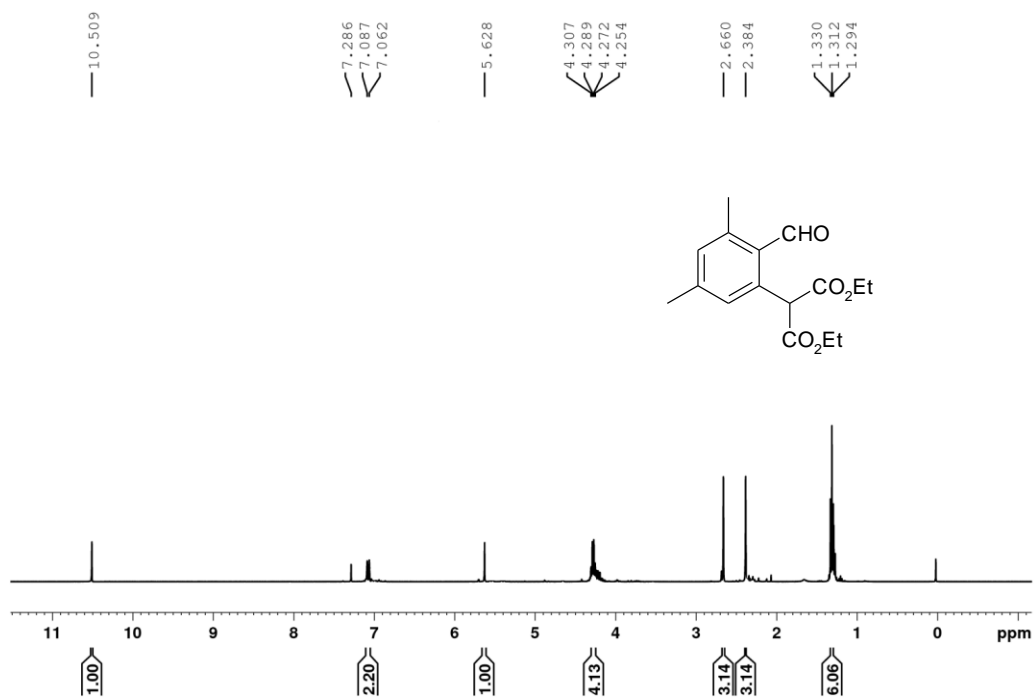

**Figure S20.**  $^1\text{H}$ NMR spectrum of compound **1i**

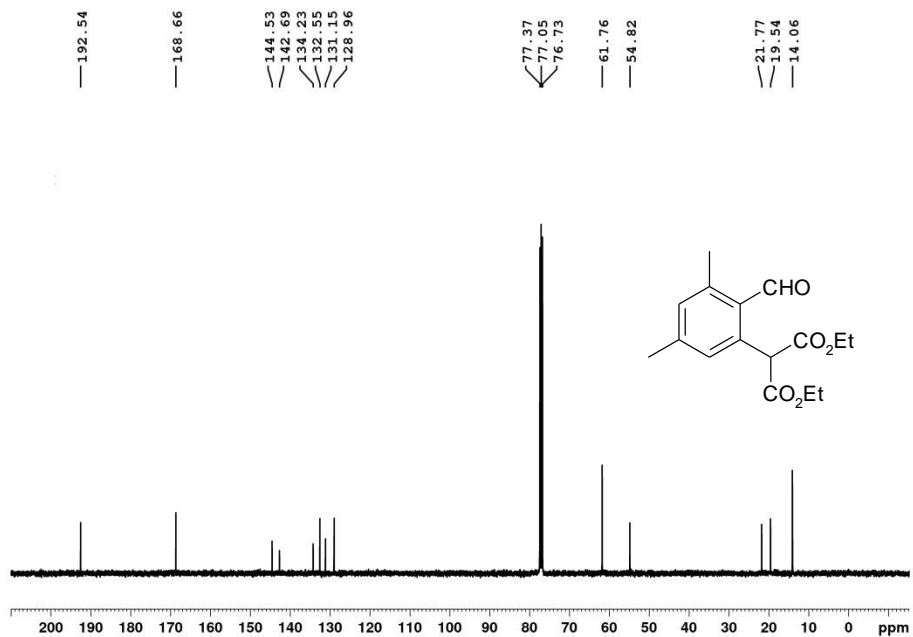

**Figure S21.**  $^{13}\text{C}$  NMR spectrum of compound **1i**

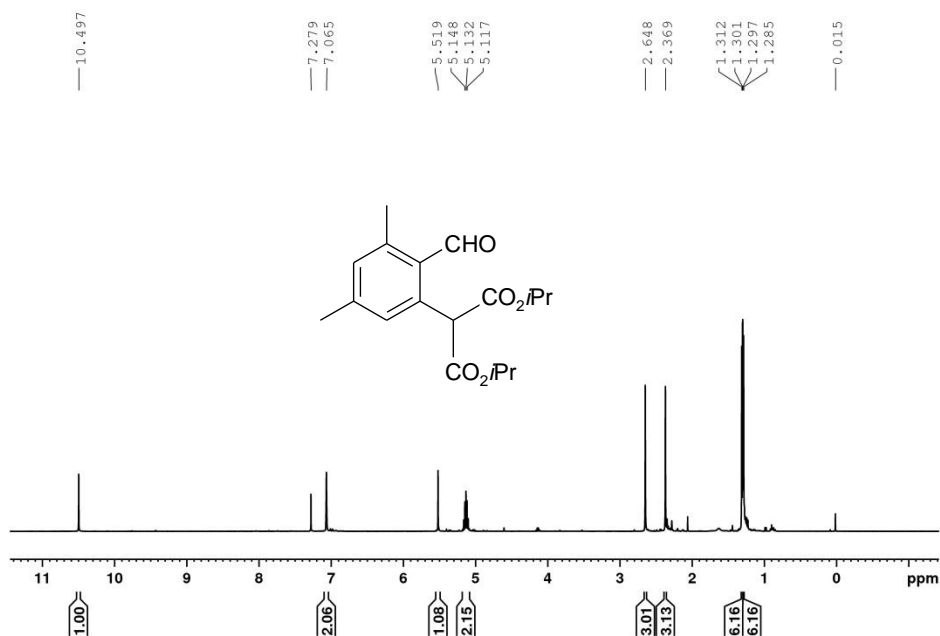

**Figure S22.**  $^1\text{H}$  NMR spectrum of compound **1j**

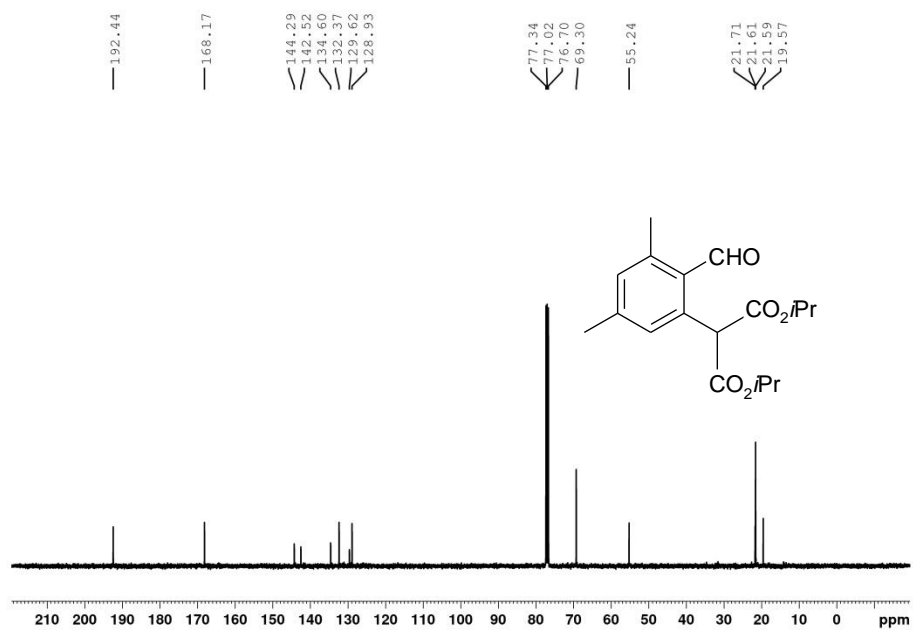

Figure S23. <sup>13</sup>C NMR spectrum of compound **1j**

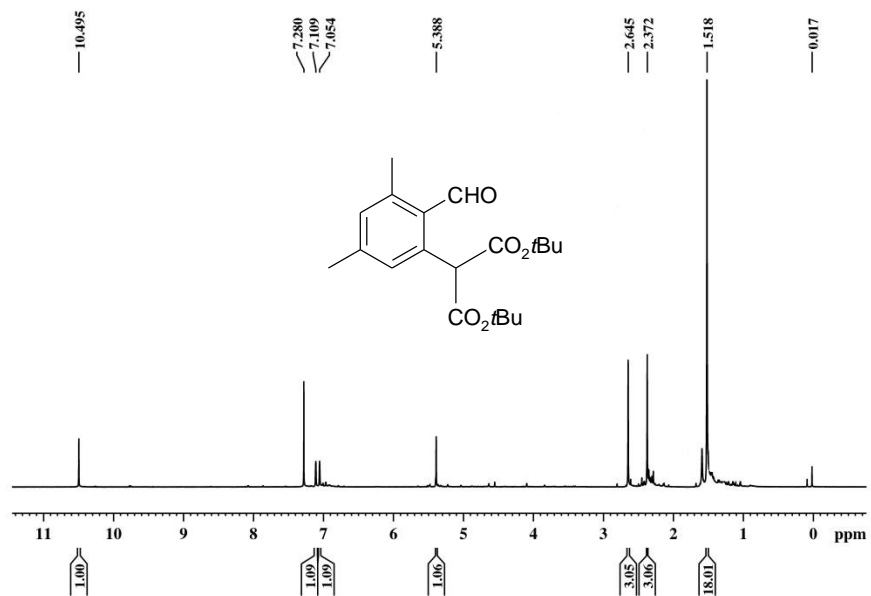

Figure S24. <sup>1</sup>H NMR spectrum of compound **1k**

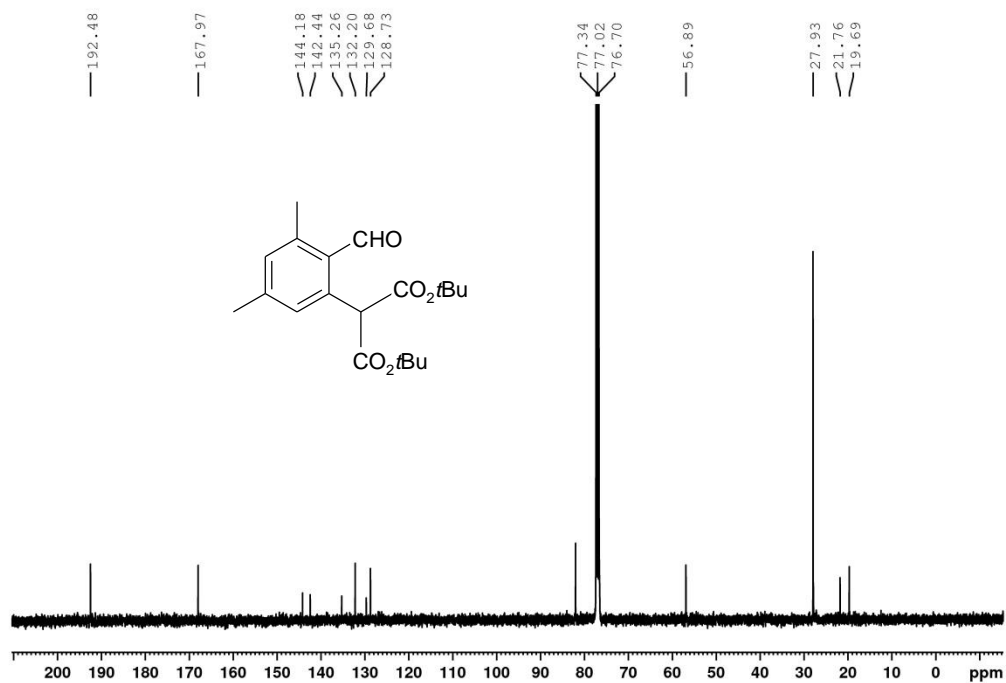

Figure S25.  $^{13}\text{C}$  NMR spectrum of compound **1k**

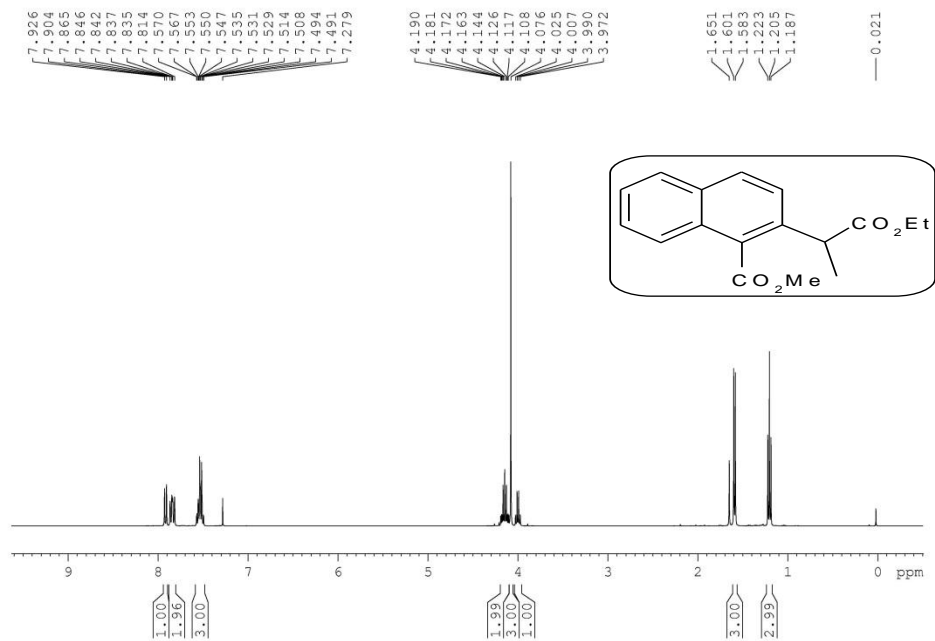

Figure S26.  $^1\text{H}$  NMR spectrum of compound **3aa**

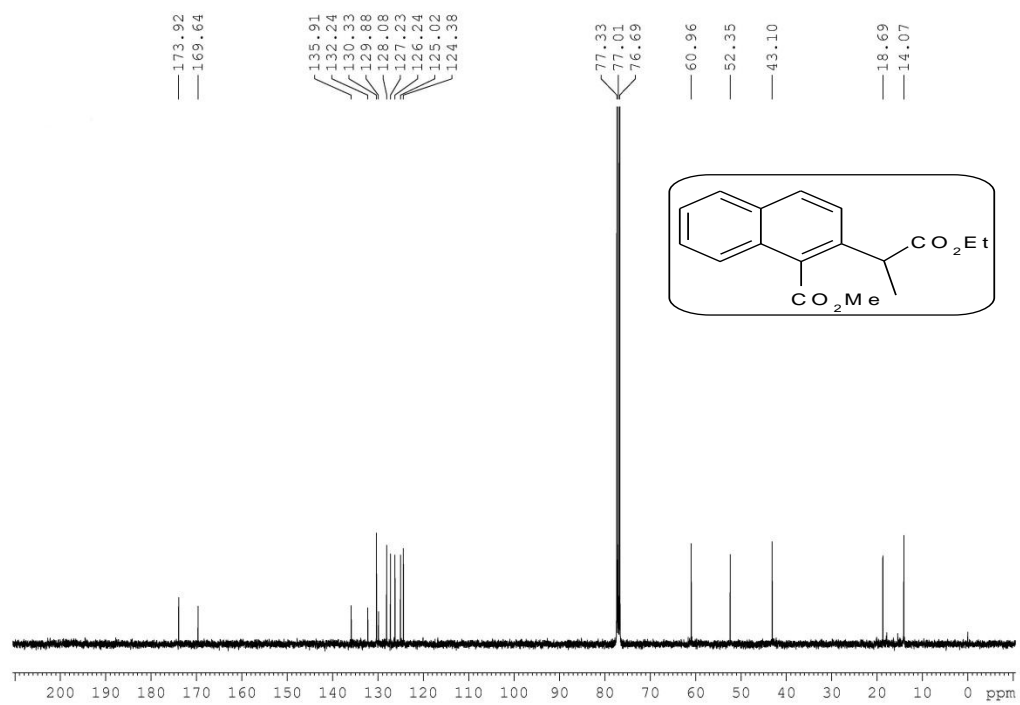

Figure S27. <sup>13</sup>C NMR spectrum of compound 3aa

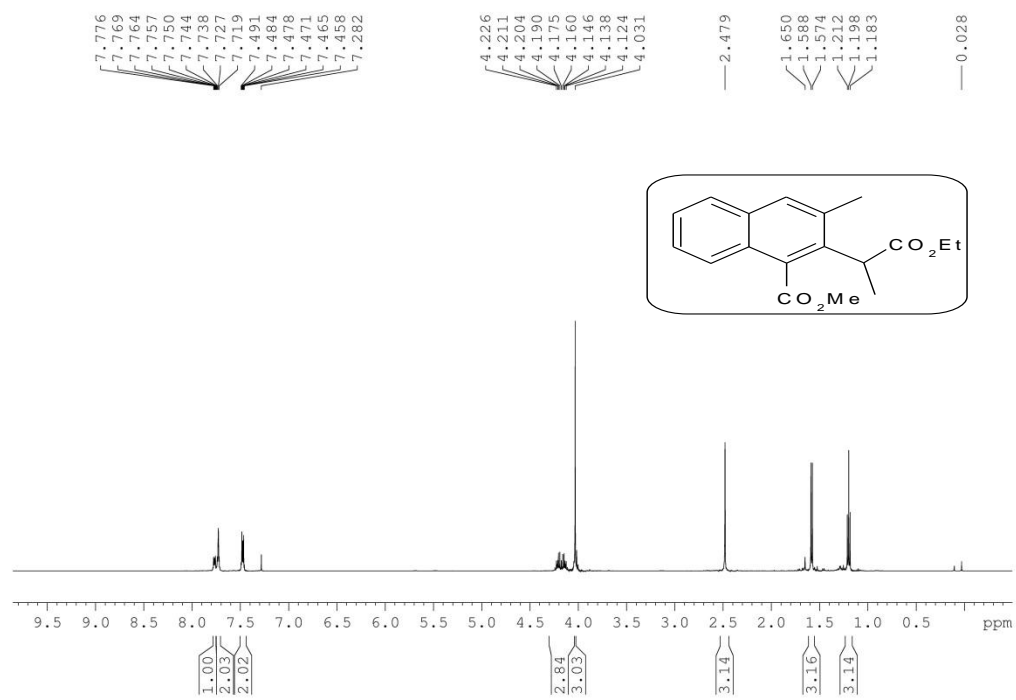



**Figure S28.**  $^1\text{H}$  NMR spectrum of compound **3ab**

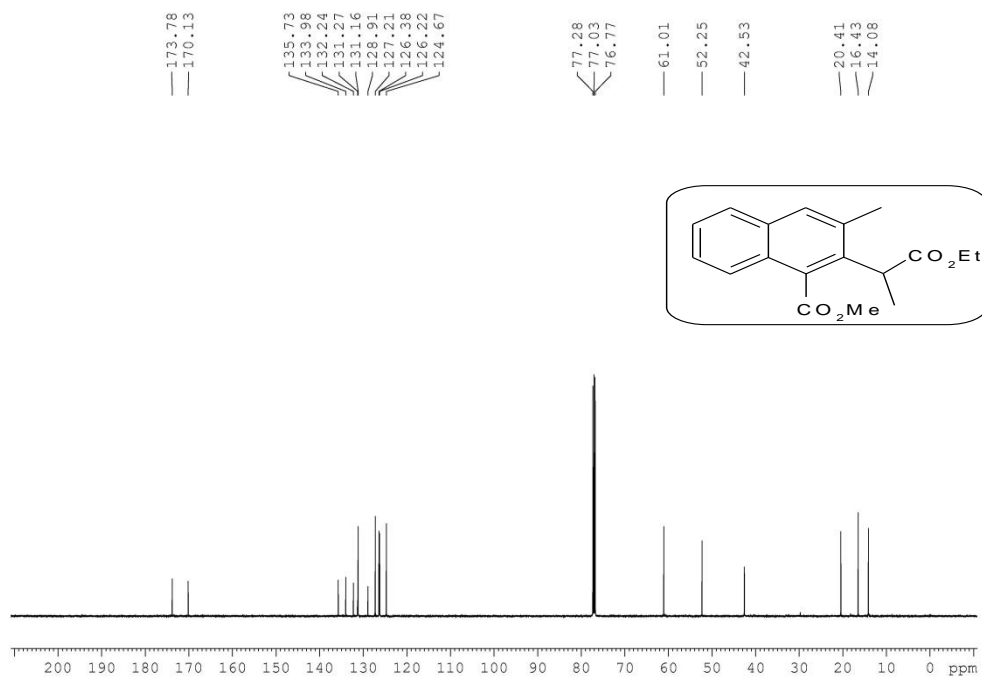

**Figure S29.**  $^{13}\text{C}$  NMR spectrum of compound **3ab**

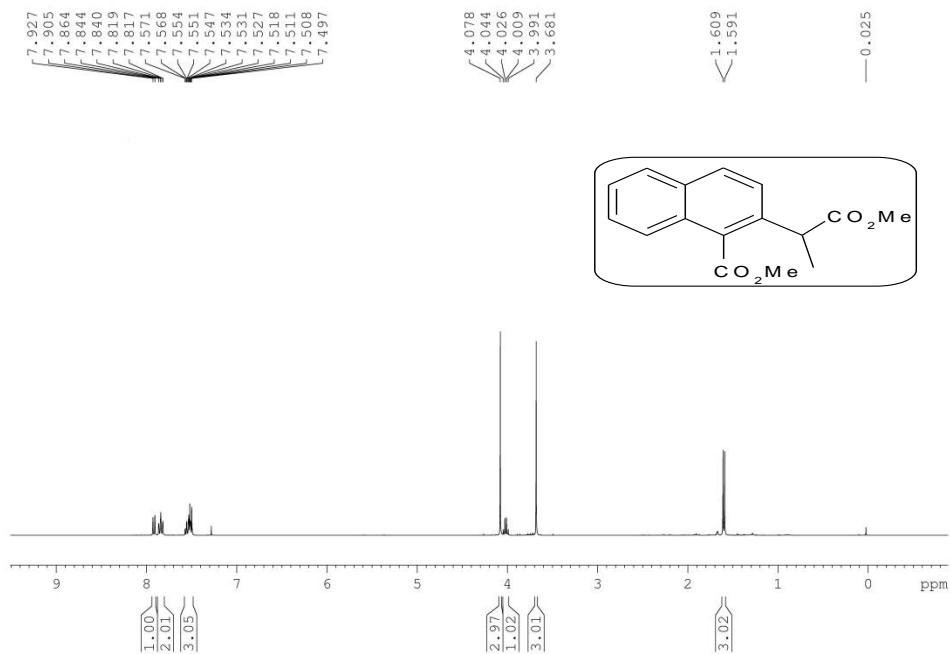

**Figure S30.**  $^1\text{H}$  NMR spectrum of compound **3ac**

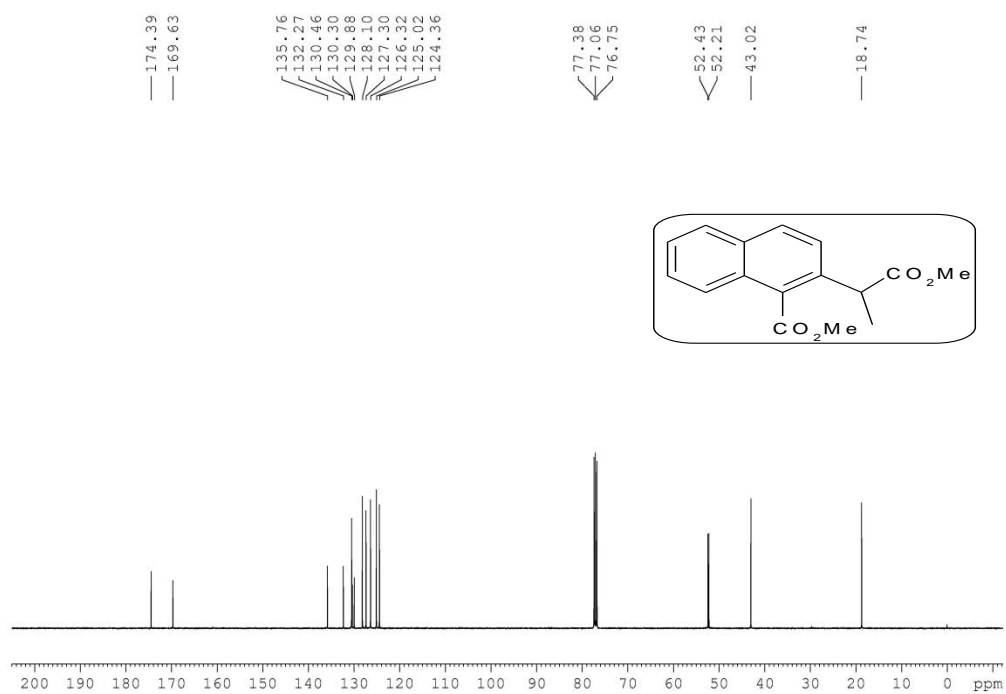

**Figure S31.**  $^{13}\text{C}$  NMR spectrum of compound **3ac**

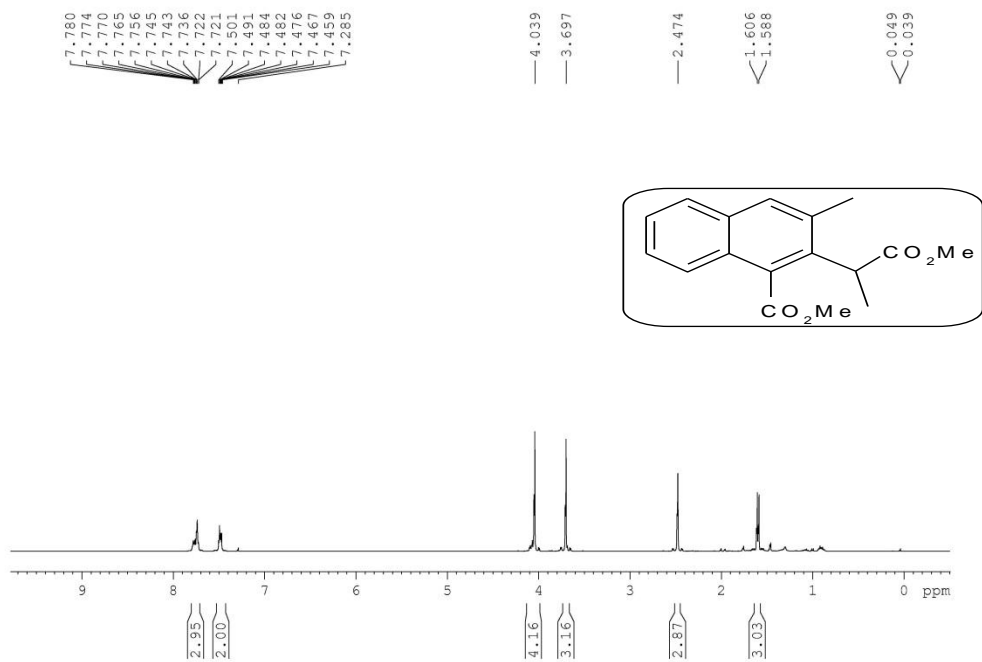

**Figure S32.**  $^1\text{H}$  NMR spectrum of compound **3ad**

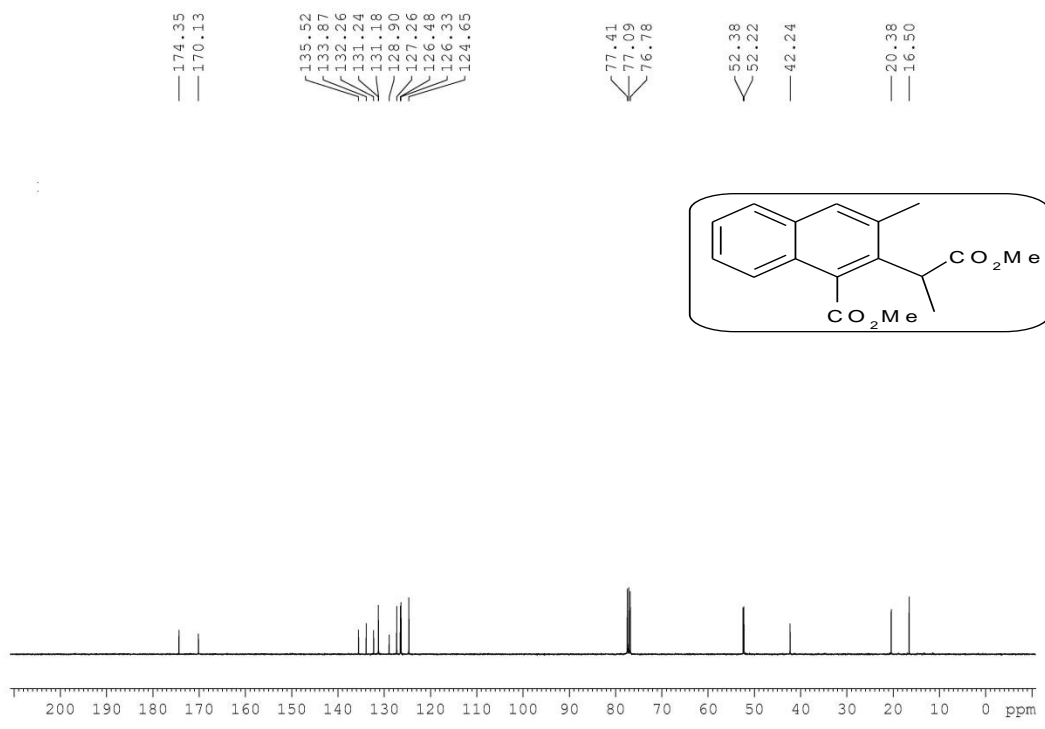

**Figure S33.** <sup>13</sup>C NMR spectrum of compound **3ad**

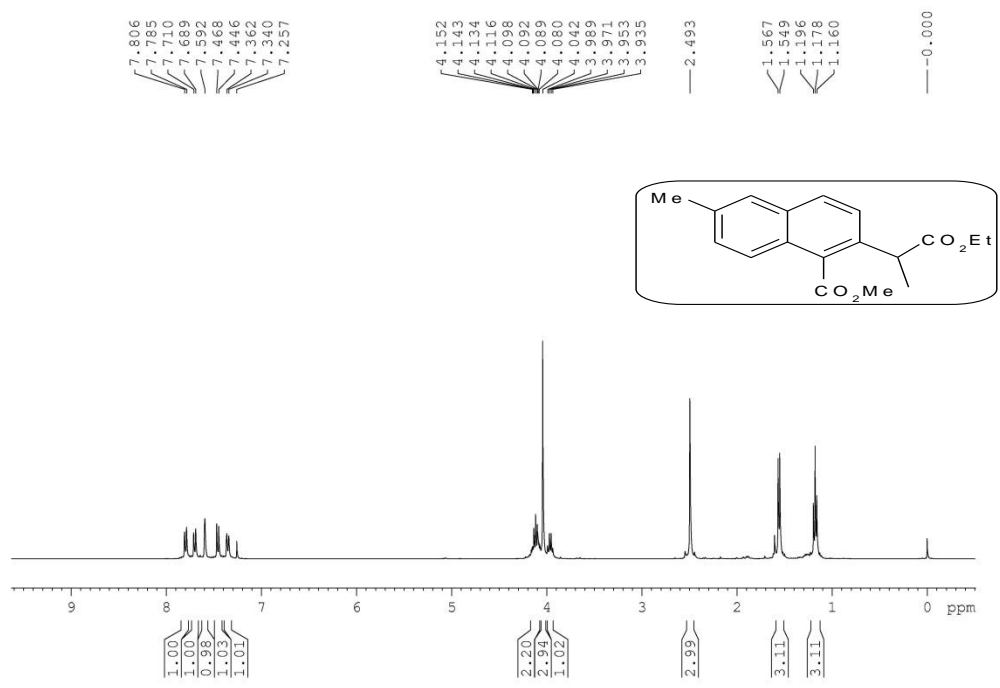

**Figure S34.**  $^1\text{H}$  NMR spectrum of compound **3ba**

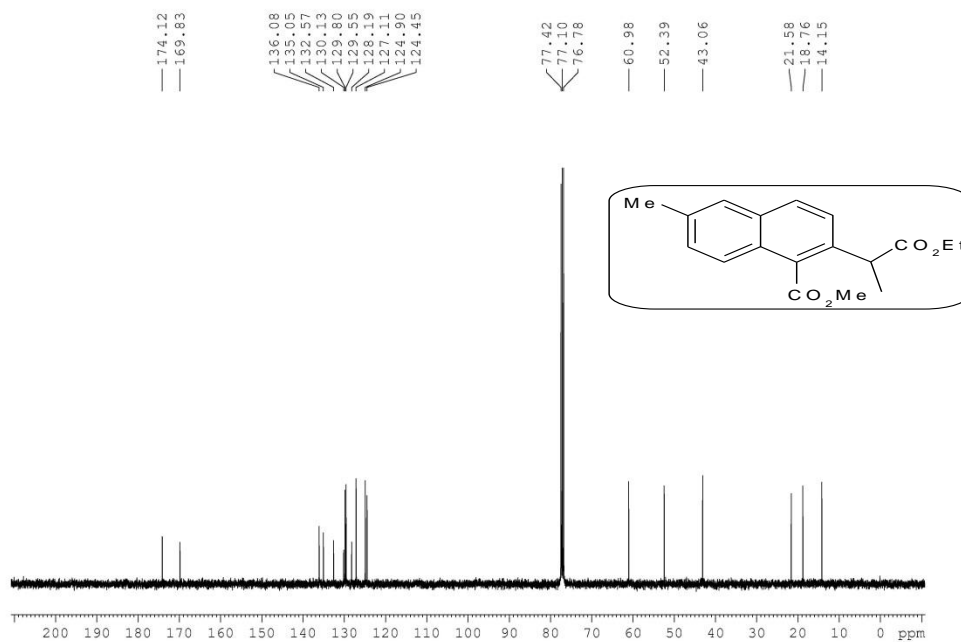

**Figure S35.**  $^{13}\text{C}$  NMR spectrum of compound **3ba**

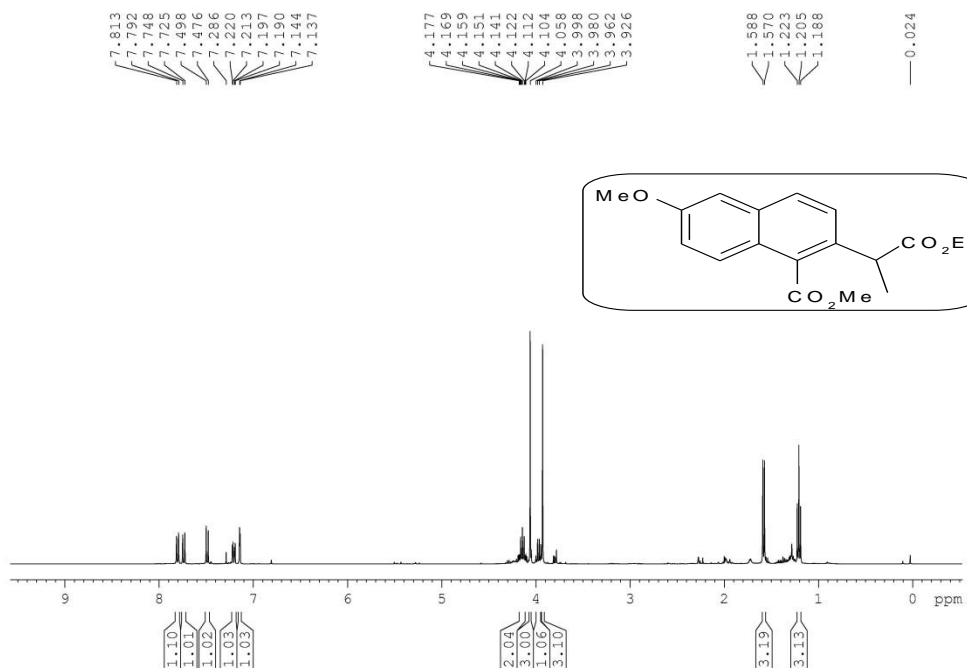

**Figure S36.**  $^1\text{H}$  NMR spectrum of compound **3ca**

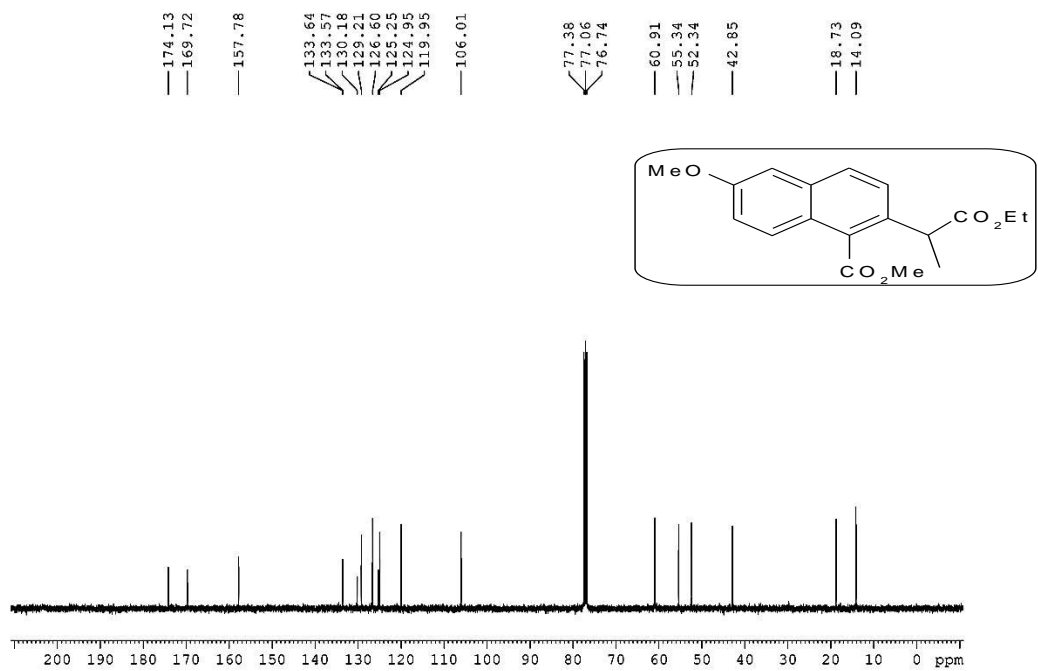

**Figure S37.**  $^{13}\text{C}$  NMR spectrum of compound **3ca**

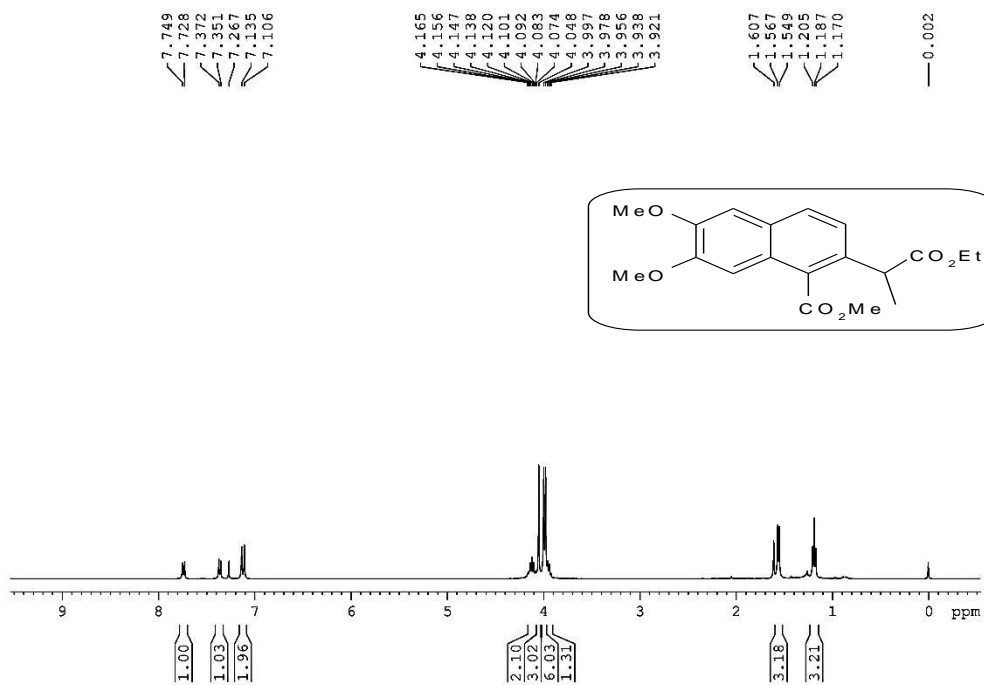

**Figure S38.**  $^1\text{H}$  NMR spectrum of compound **3da**

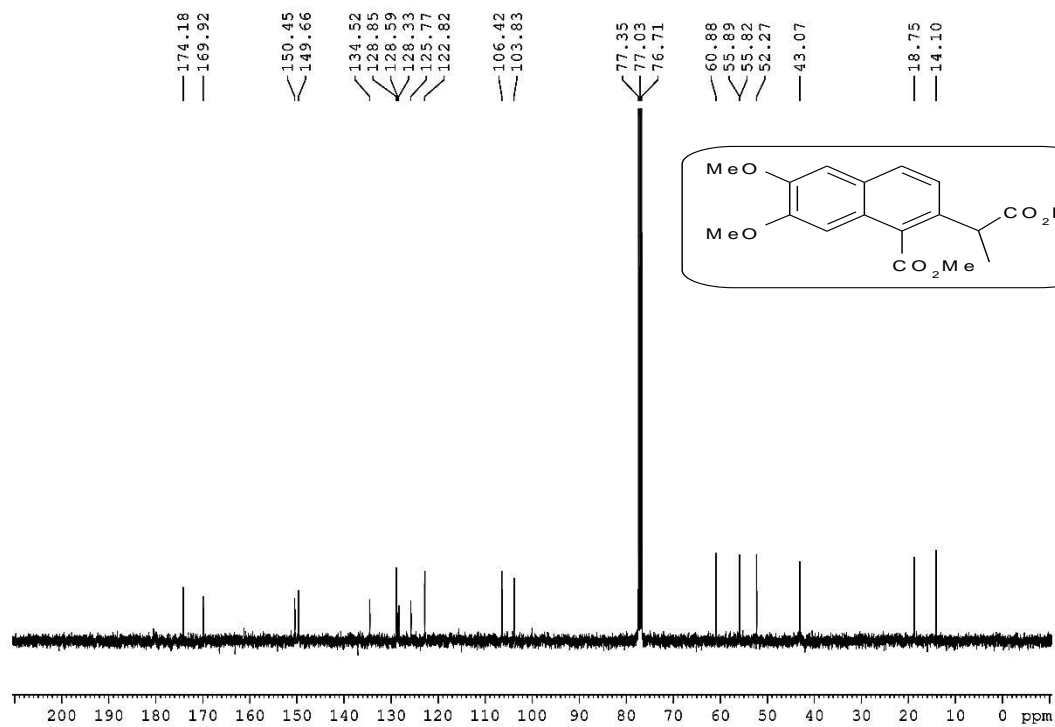

Figure S39. <sup>13</sup>C NMR spectrum of compound 3da

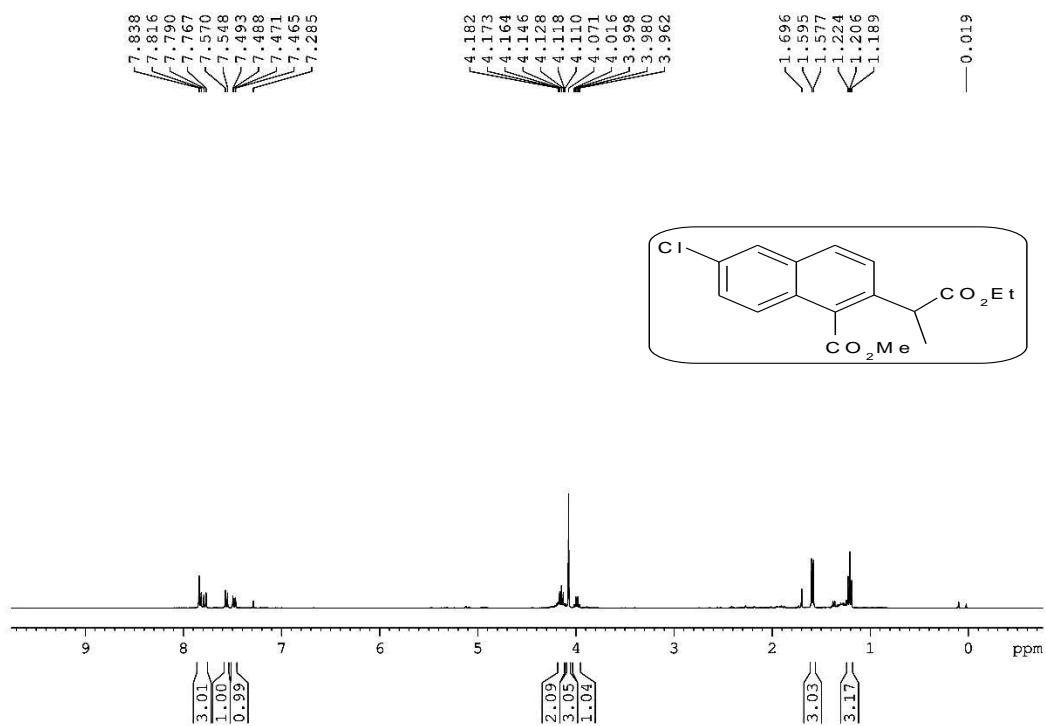

Figure S40.  $^1\text{H}$  NMR spectrum of compound **3ea**

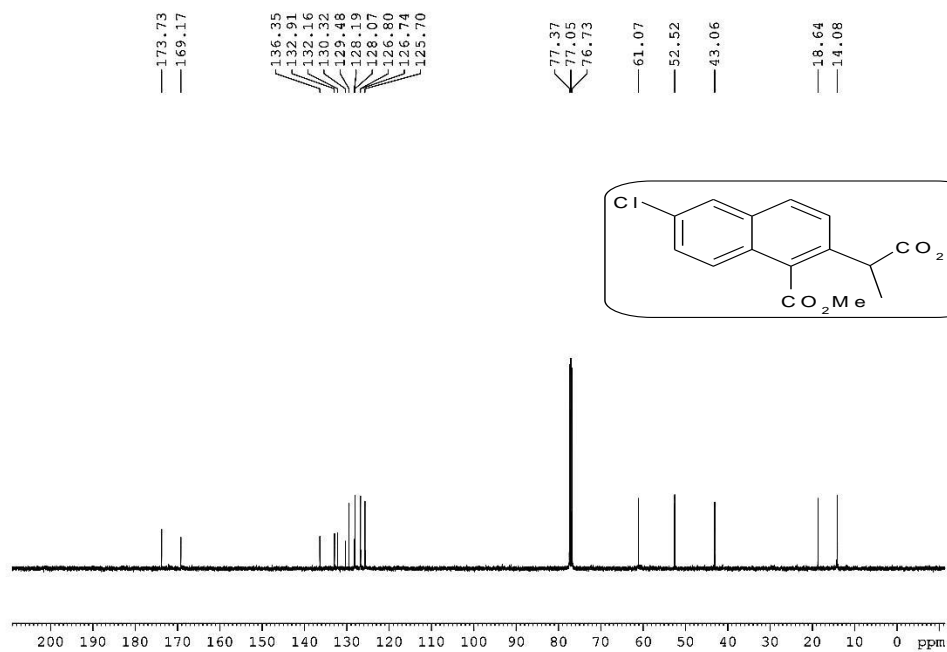

Figure S41.  $^{13}\text{C}$  NMR spectrum of compound **3ea**

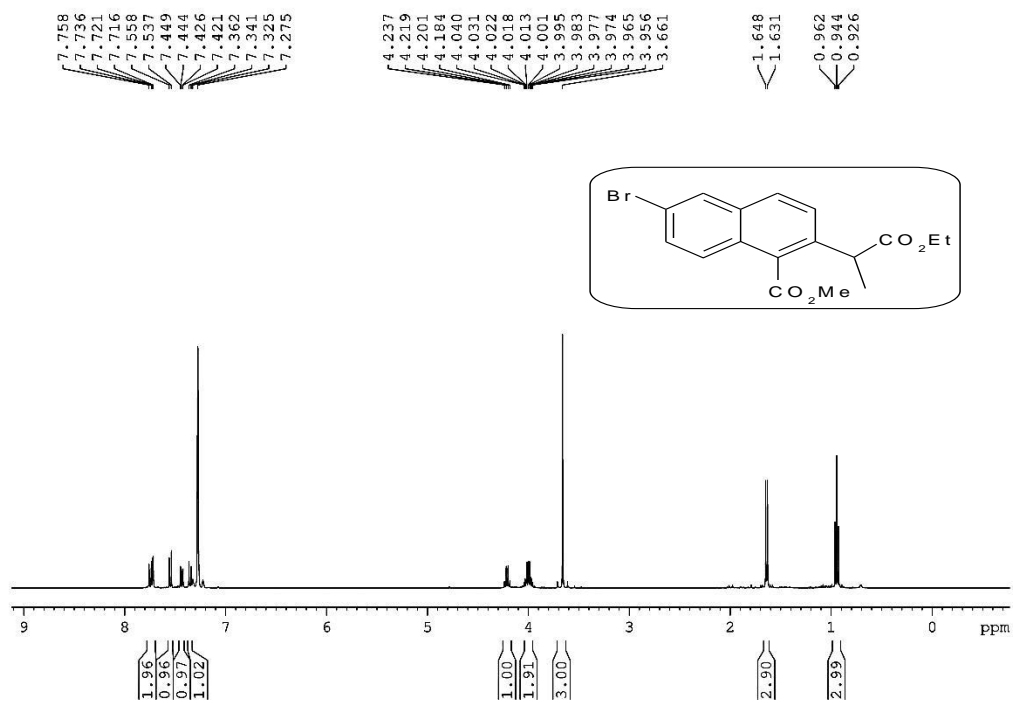

Figure S42.  $^1\text{H}$  NMR spectrum of compound **3fa**

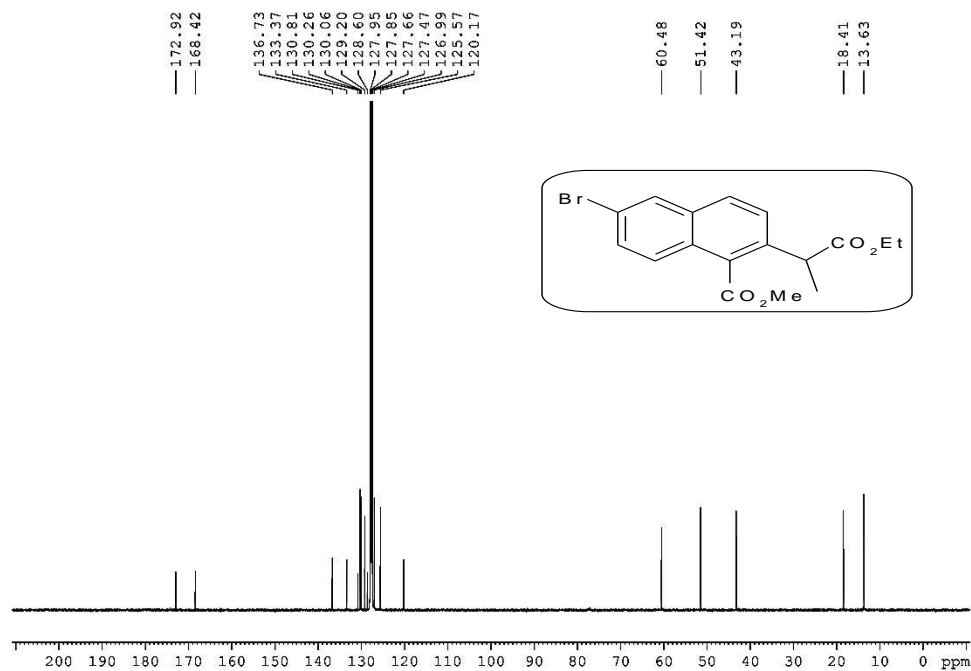

Figure S43.  $^{13}\text{C}$  NMR spectrum of compound **3fa**

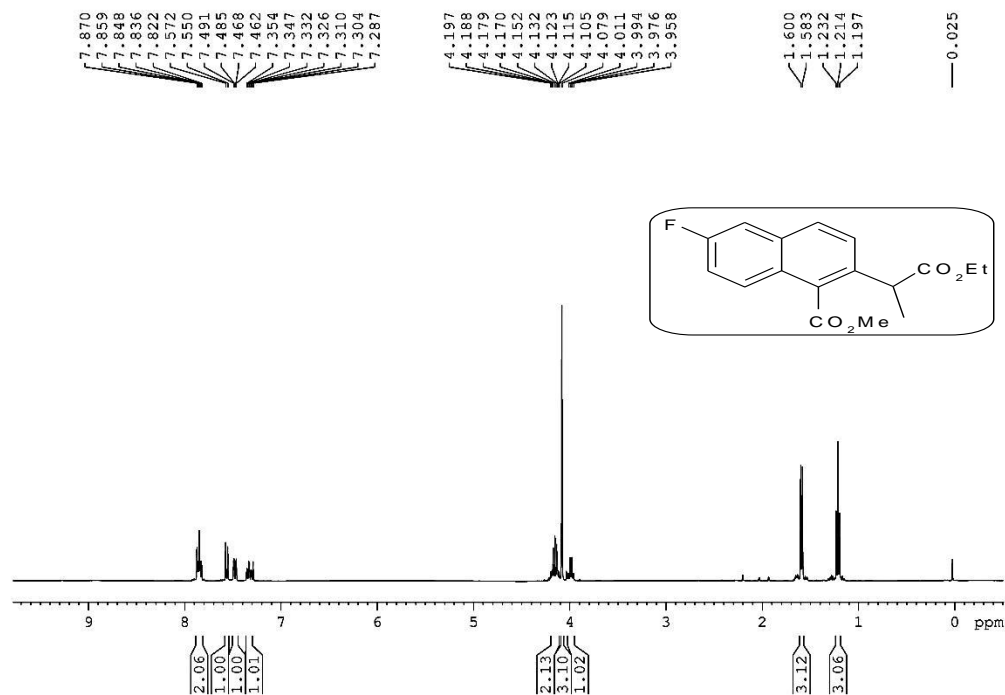

Figure S44.  $^1\text{H}$  NMR spectrum of compound **3ga**



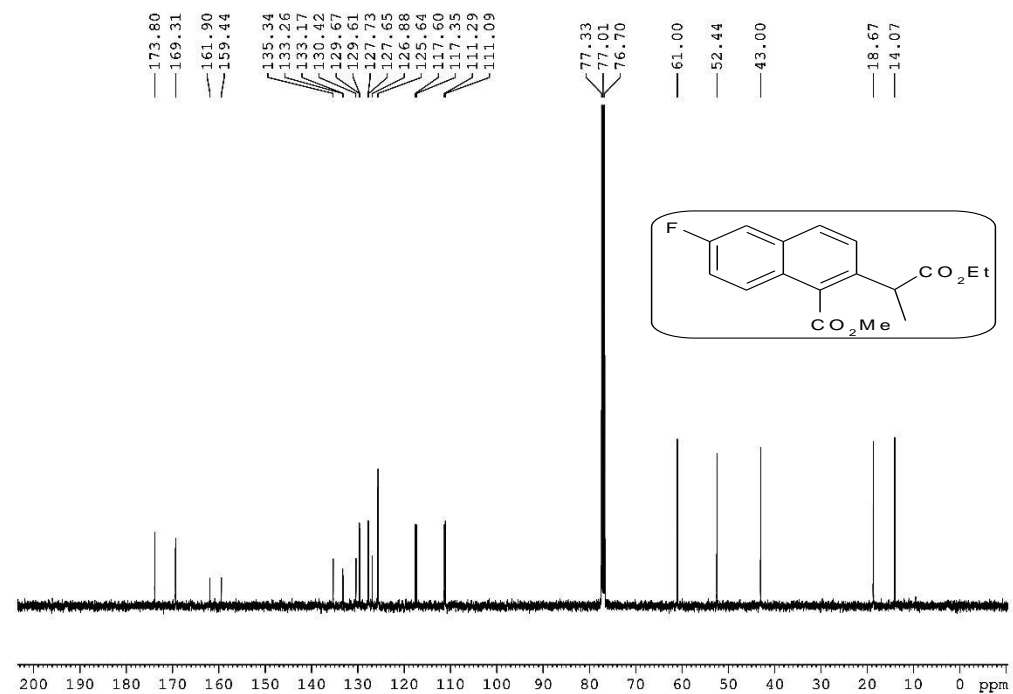

Figure S45.  $^{13}\text{C}$  NMR spectrum of compound 3ga

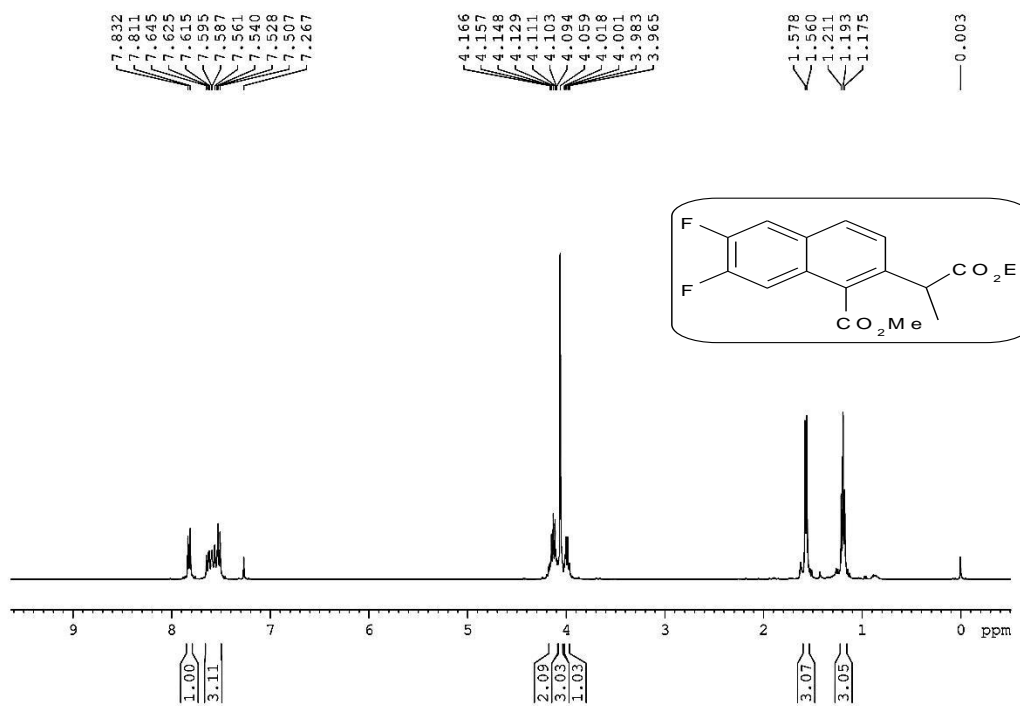

Figure S46.  $^1\text{H}$  NMR spectrum of compound 3ha

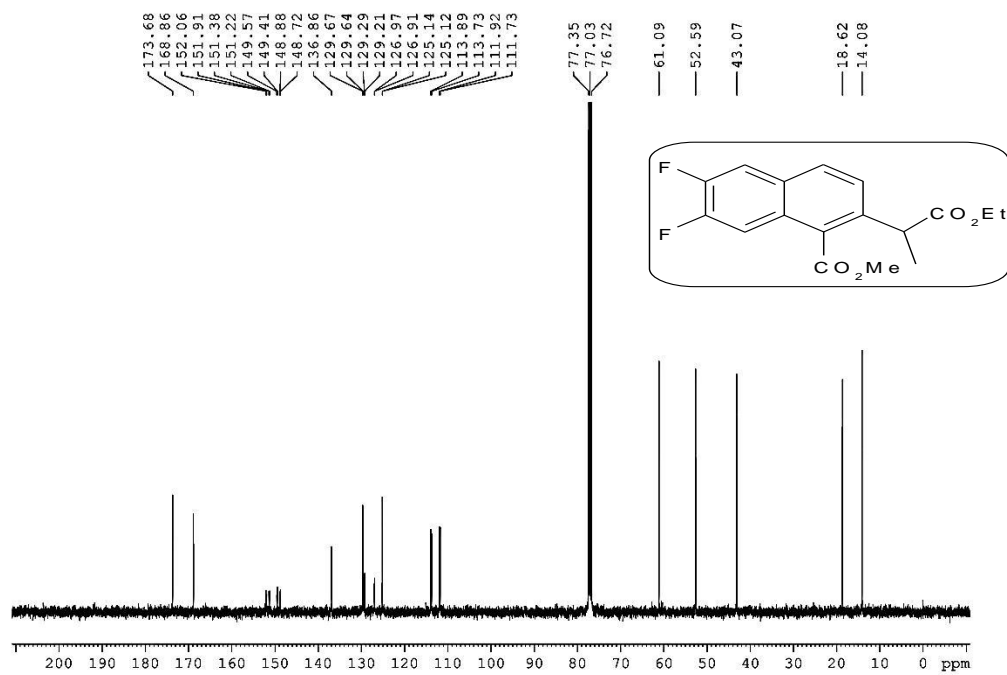

**Figure S47.**  $^{13}\text{C}$  NMR spectrum of compound **3ha**

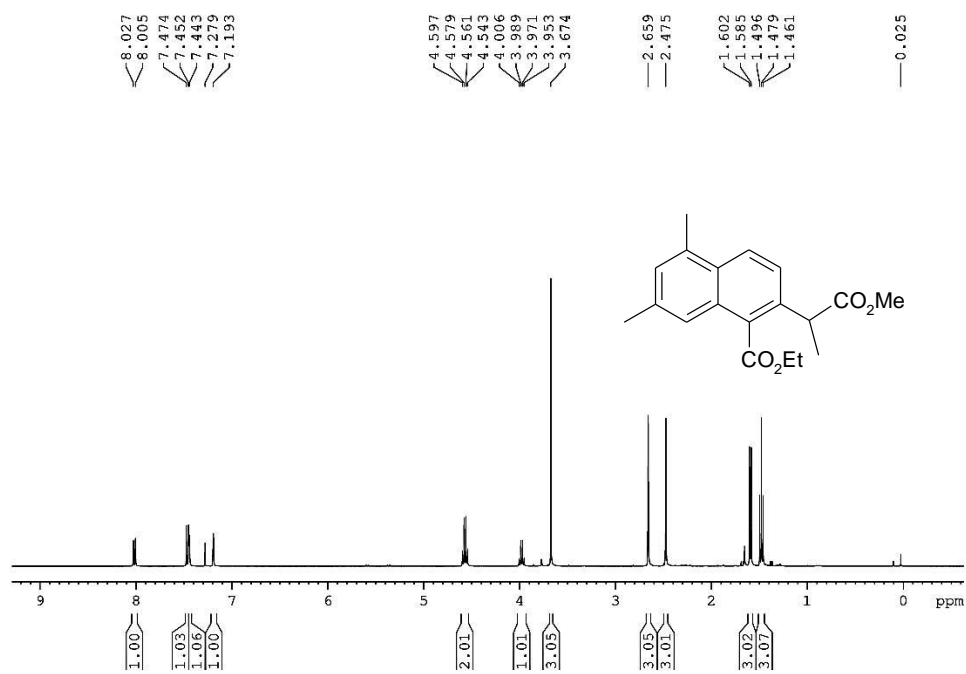

**Figure S48.**  $^1\text{H}$  NMR spectrum of compound **3ic**

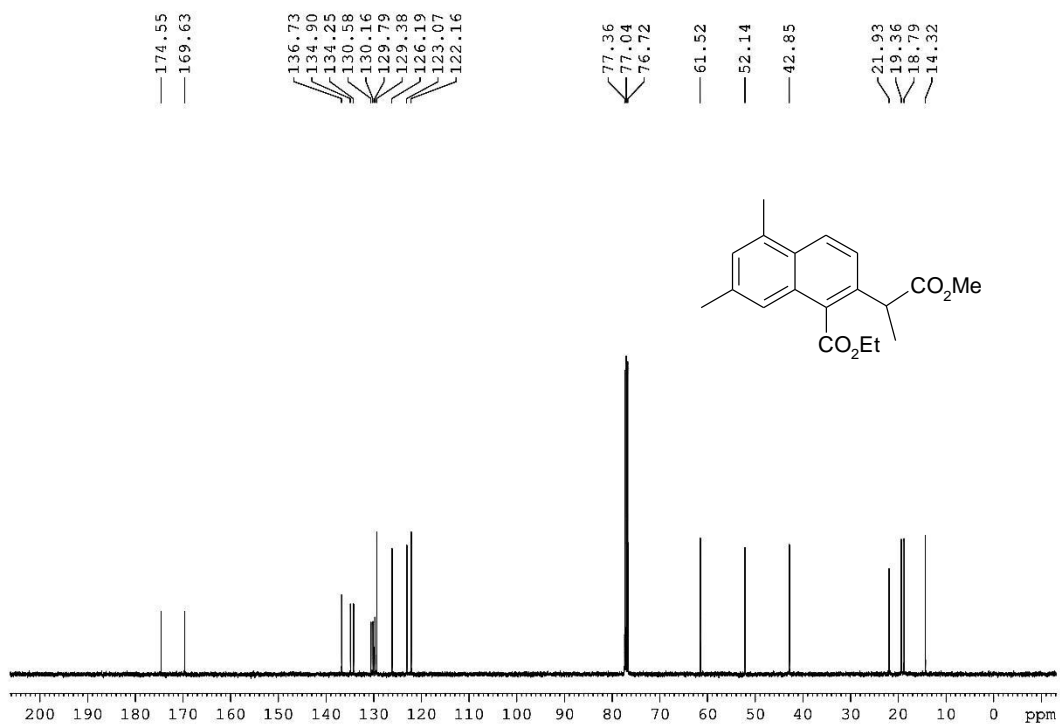

Figure S49. <sup>13</sup>C NMR spectrum of compound **3ic**

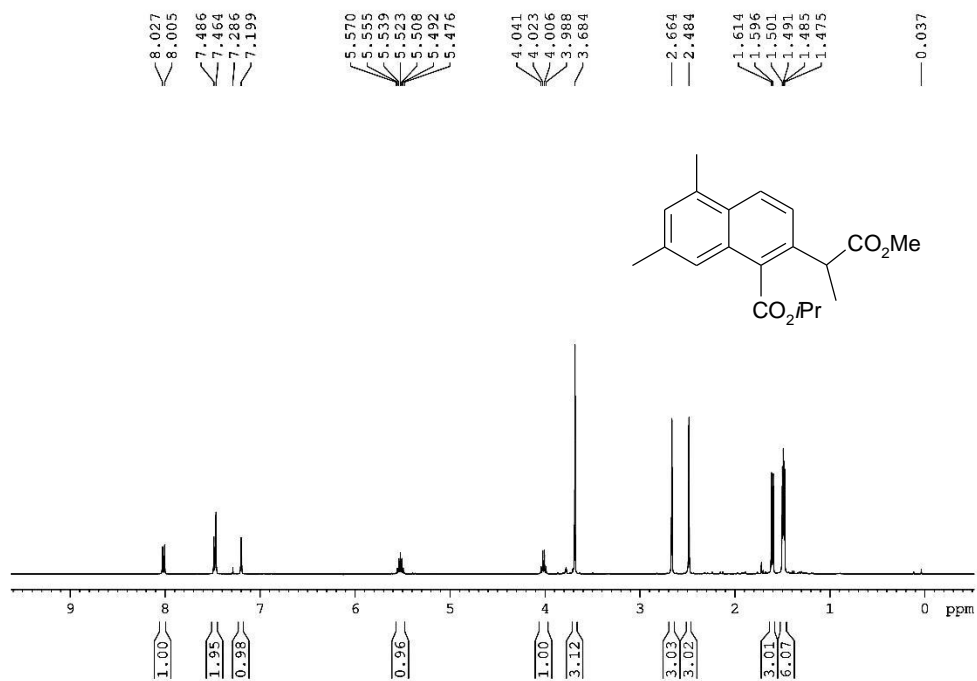

Figure S50. <sup>1</sup>H NMR spectrum of compound **3jc**

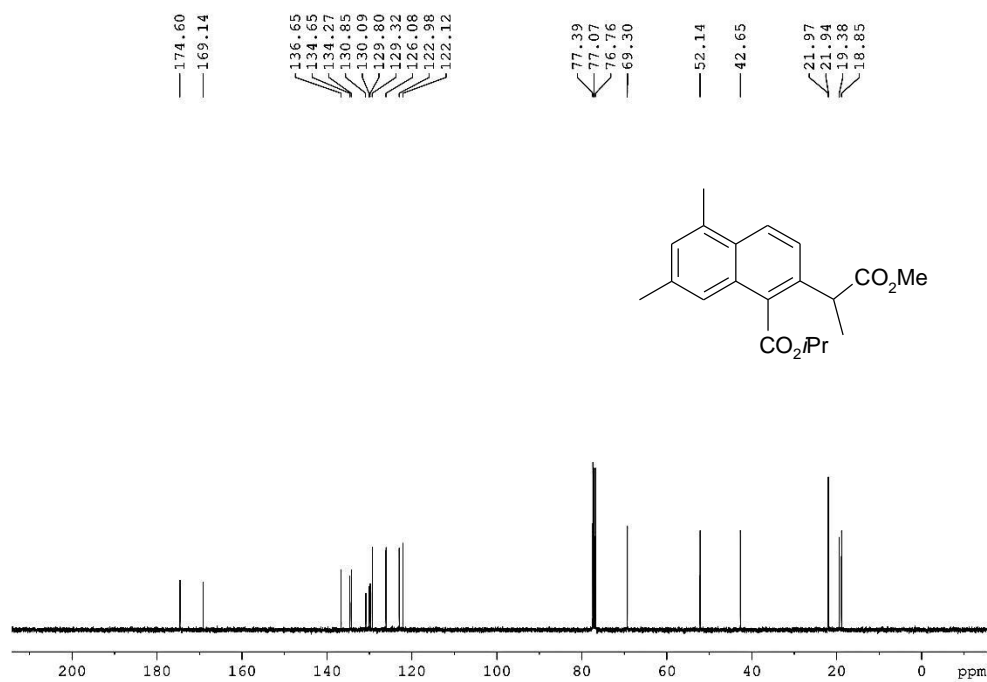

Figure S51. <sup>13</sup>C NMR spectrum of compound **3jc**

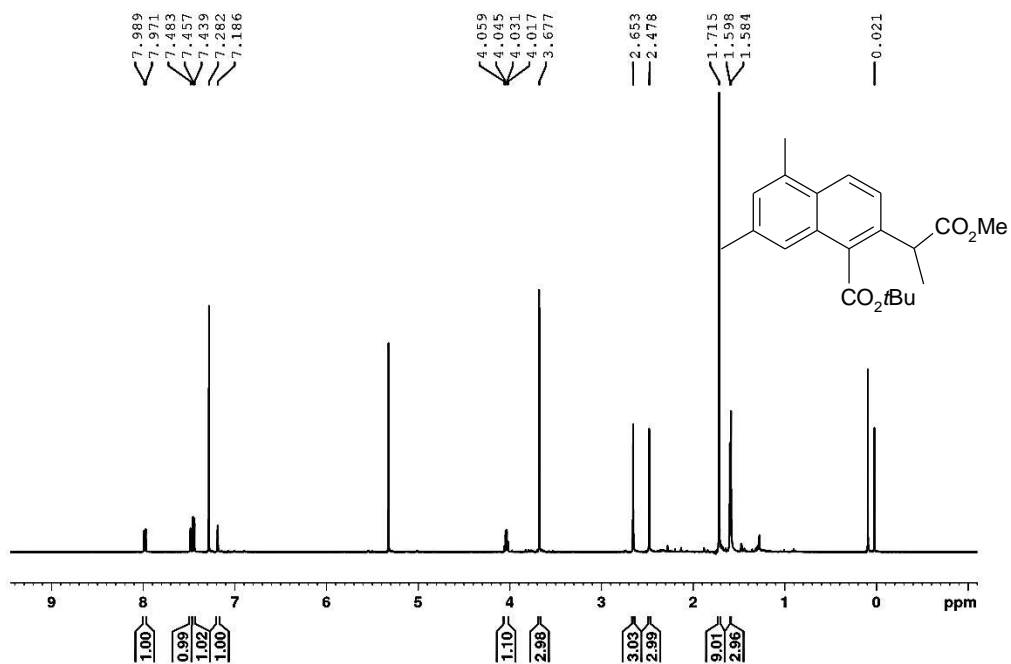

Figure S52. <sup>1</sup>H NMR spectrum of compound **3kc**

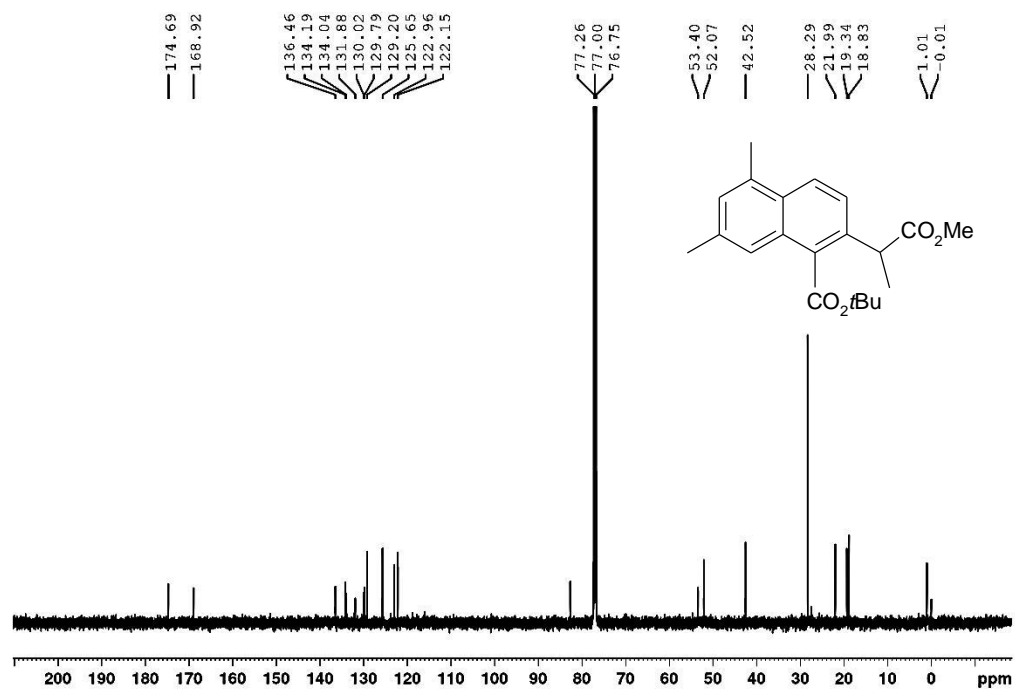

Figure S53. <sup>13</sup>C NMR spectrum of compound **3kc**

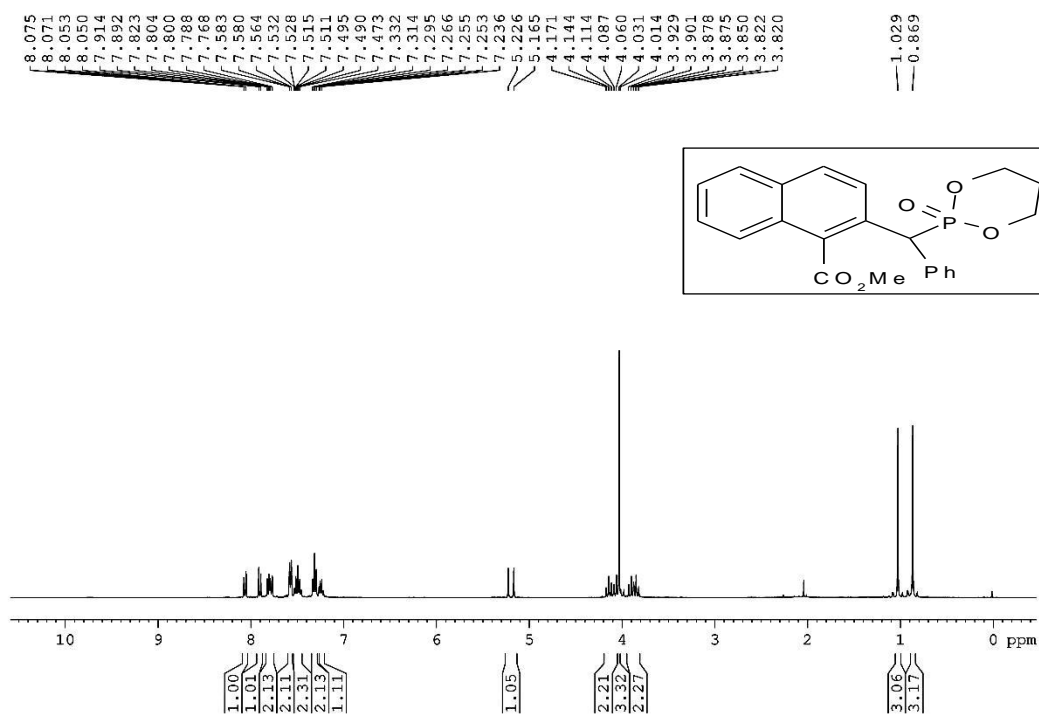

Figure S54. <sup>1</sup>H NMR spectrum of compound **3ae**

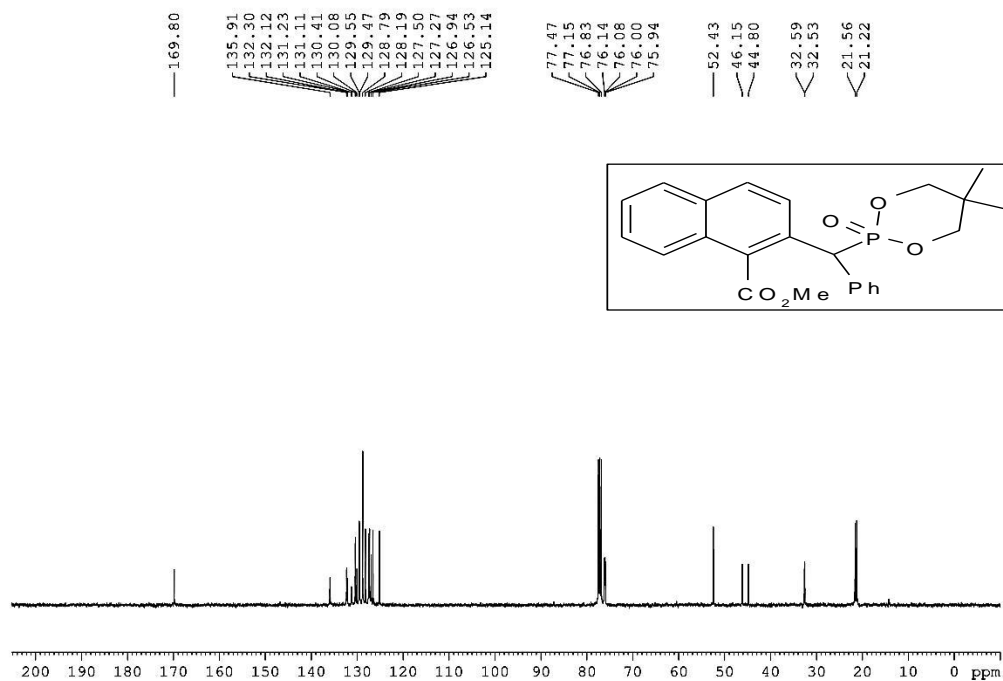

**Figure S55.**  $^{13}\text{C}$  NMR spectrum of compound **3ae**

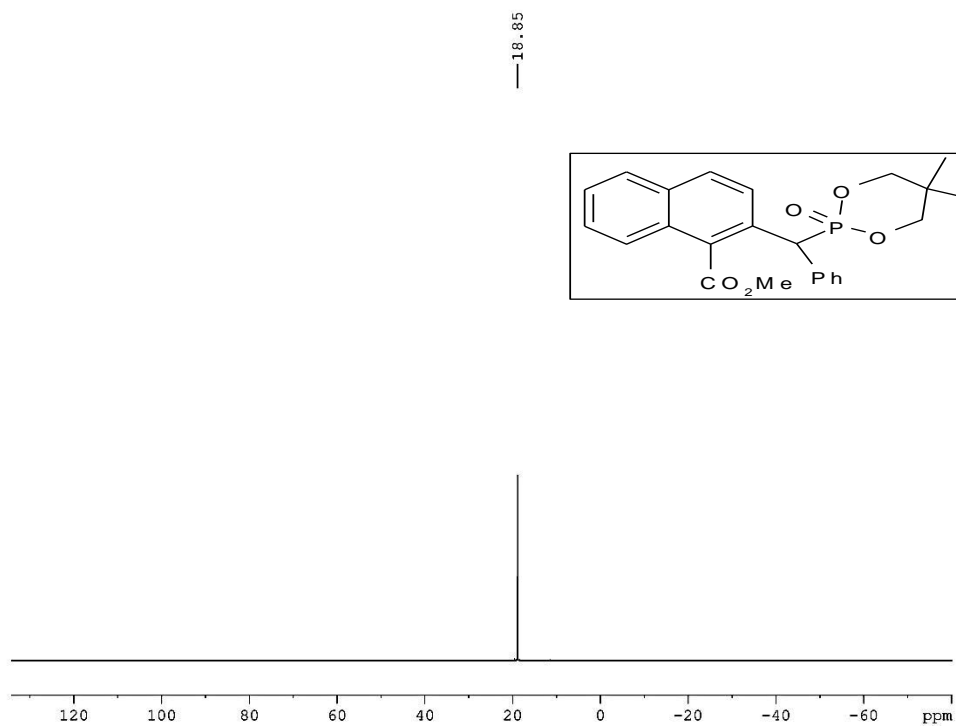

**Figure S56.**  $^{31}\text{P}$  NMR spectrum of compound **3ae**

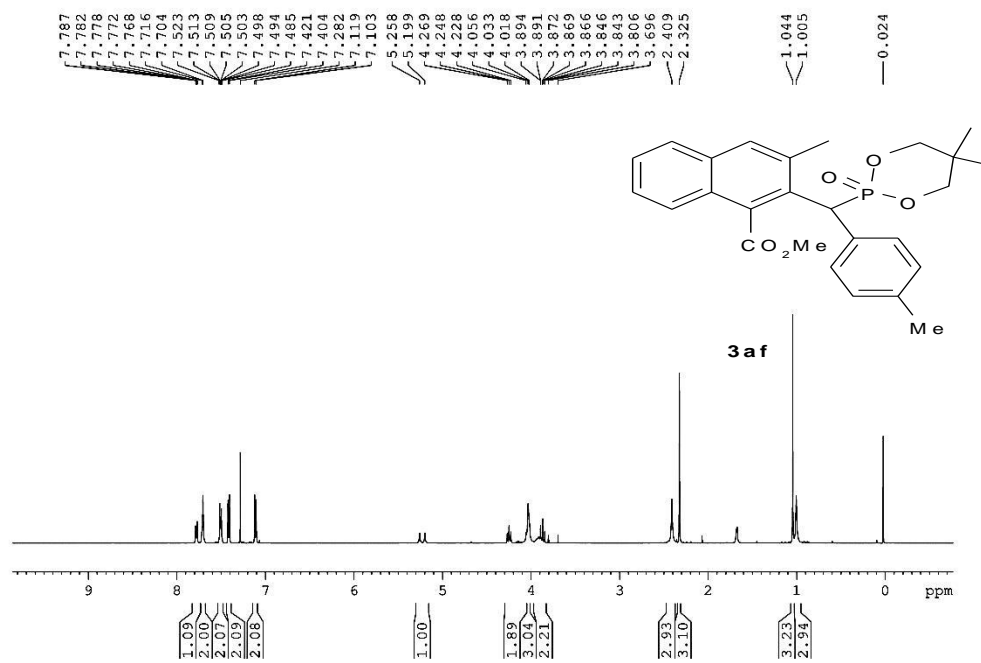

**Figure S57. <sup>1</sup>H NMR spectrum of compound 3af**

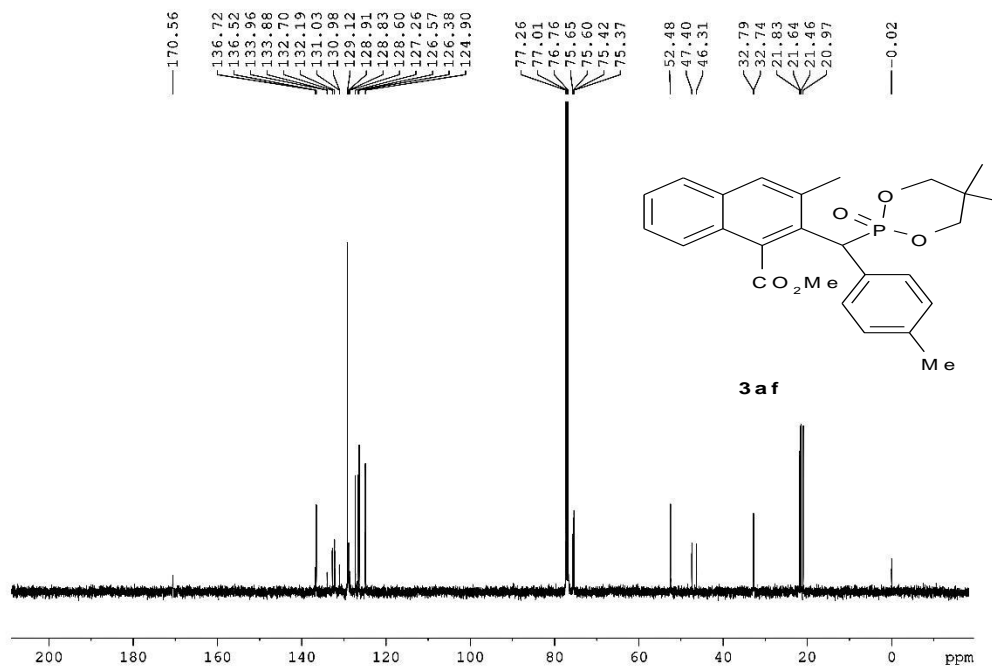

**Figure S58. <sup>13</sup>C NMR spectrum of compound 3af**

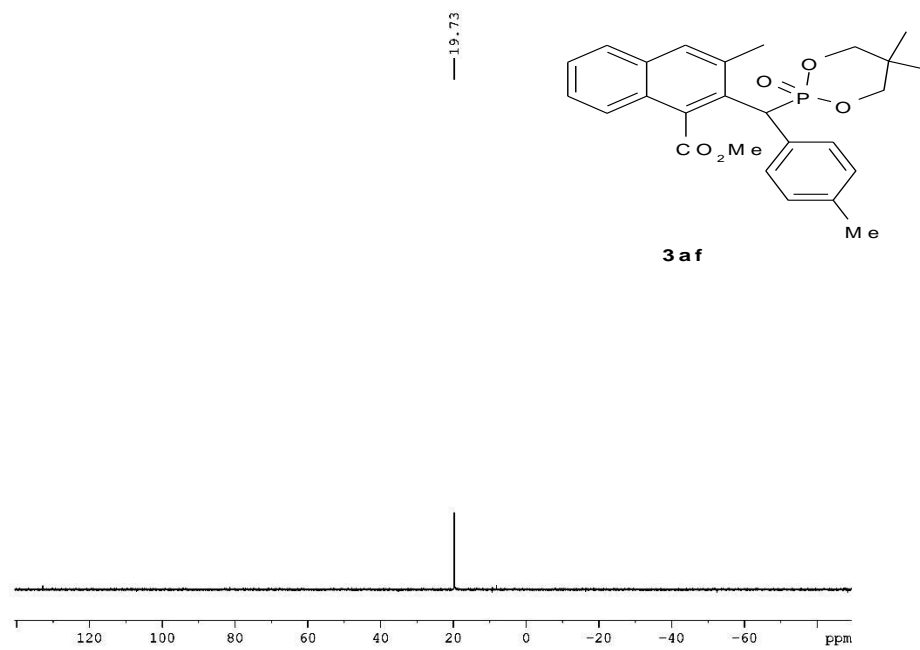

Figure S59.  $^{31}\text{P}$  NMR spectrum of compound **3af**

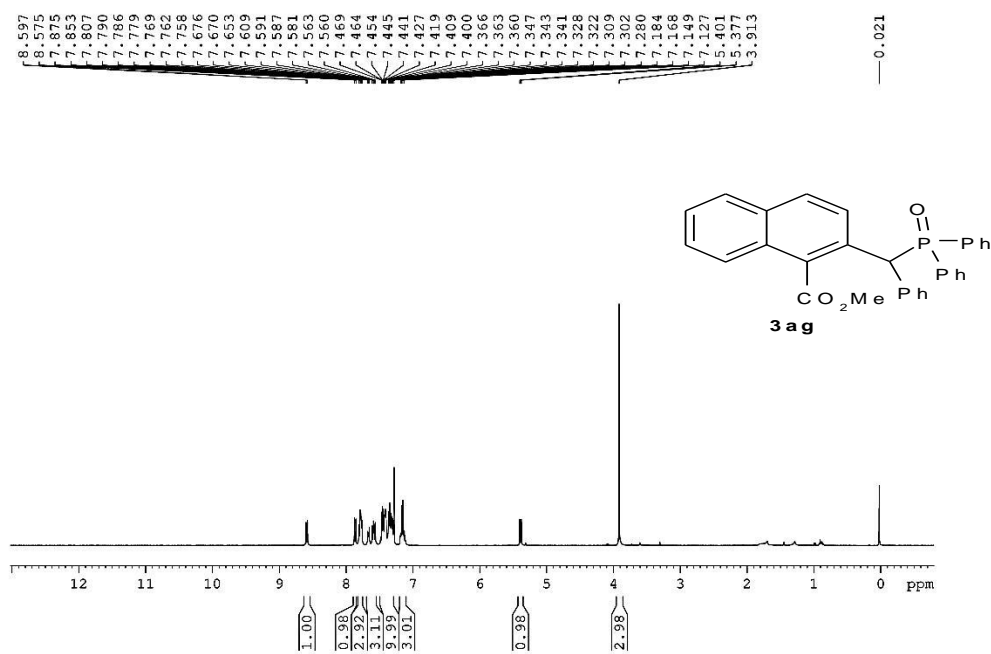

Figure S60.  $^1\text{H}$  NMR spectrum of compound **3ag**



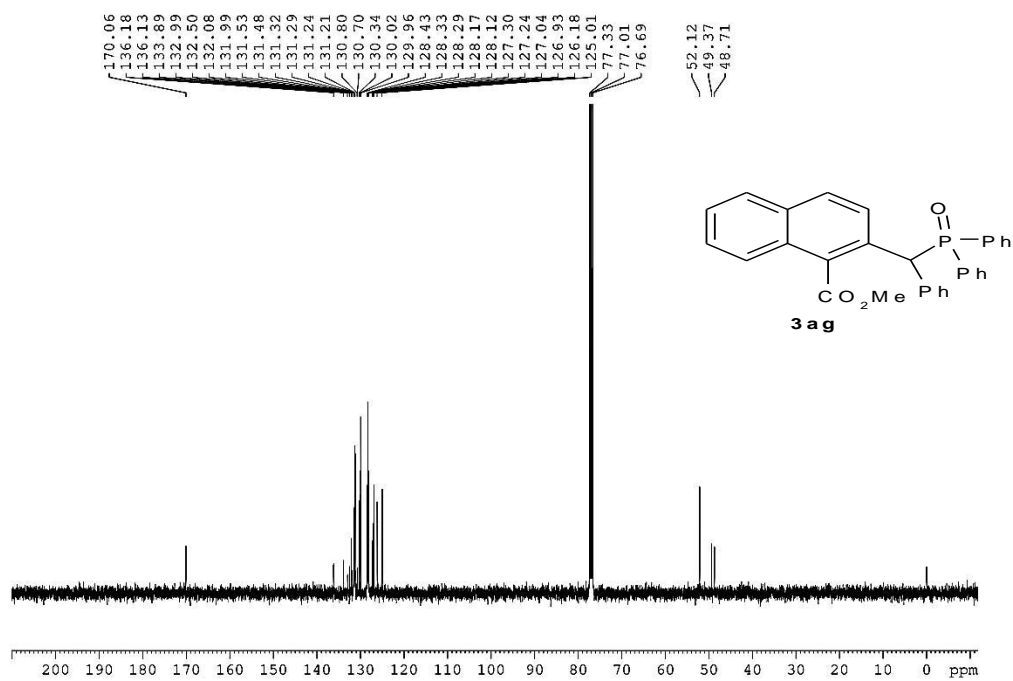

Figure S61. <sup>13</sup>C NMR spectrum of compound **3ag**

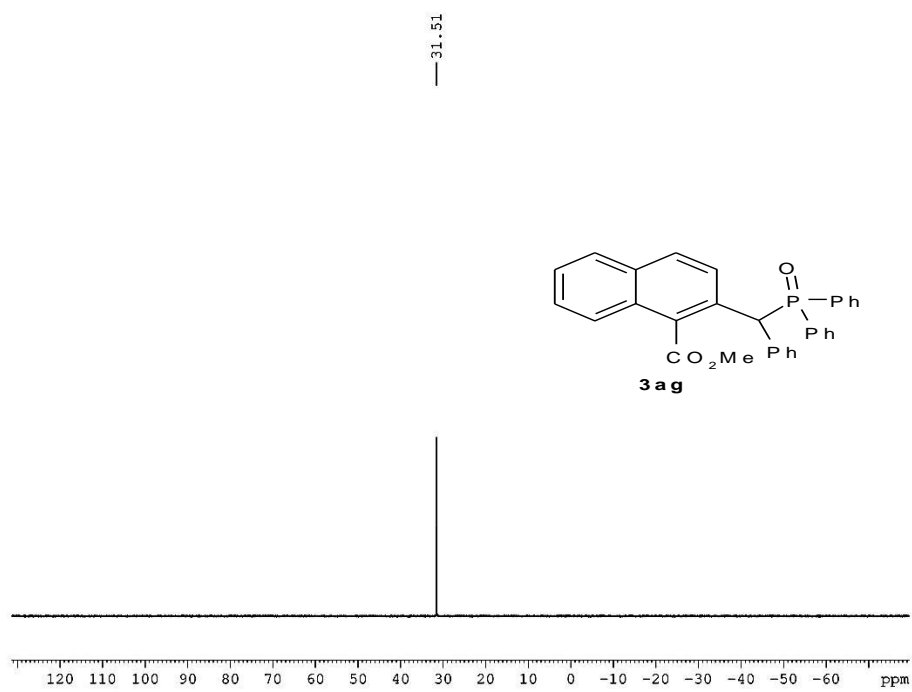

Figure S62. <sup>31</sup>P NMR spectrum of compound **3ag**

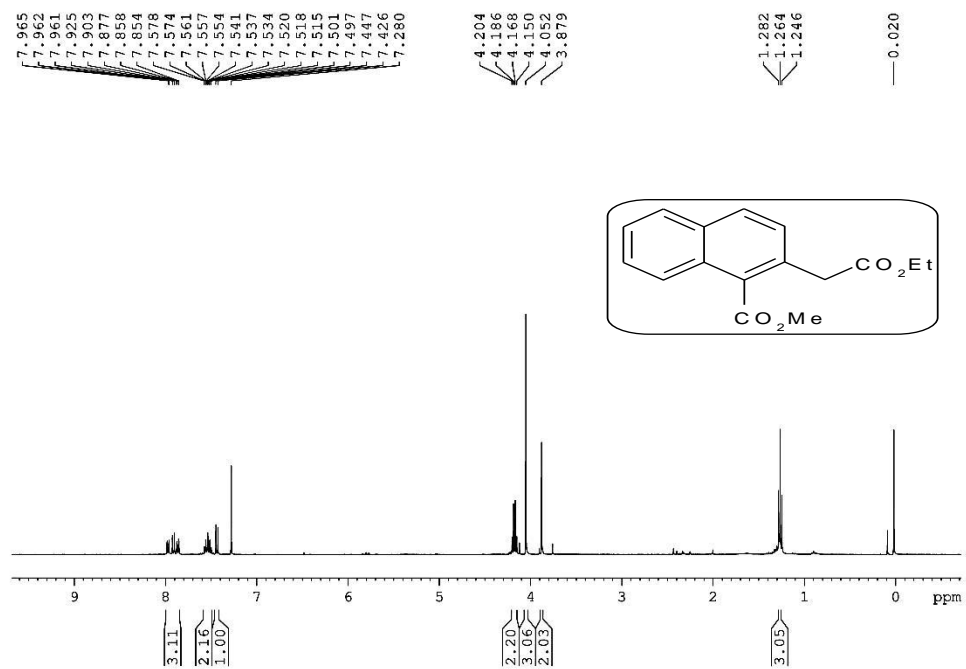

**Figure S63.** <sup>1</sup>H NMR spectrum of compound **3ah**

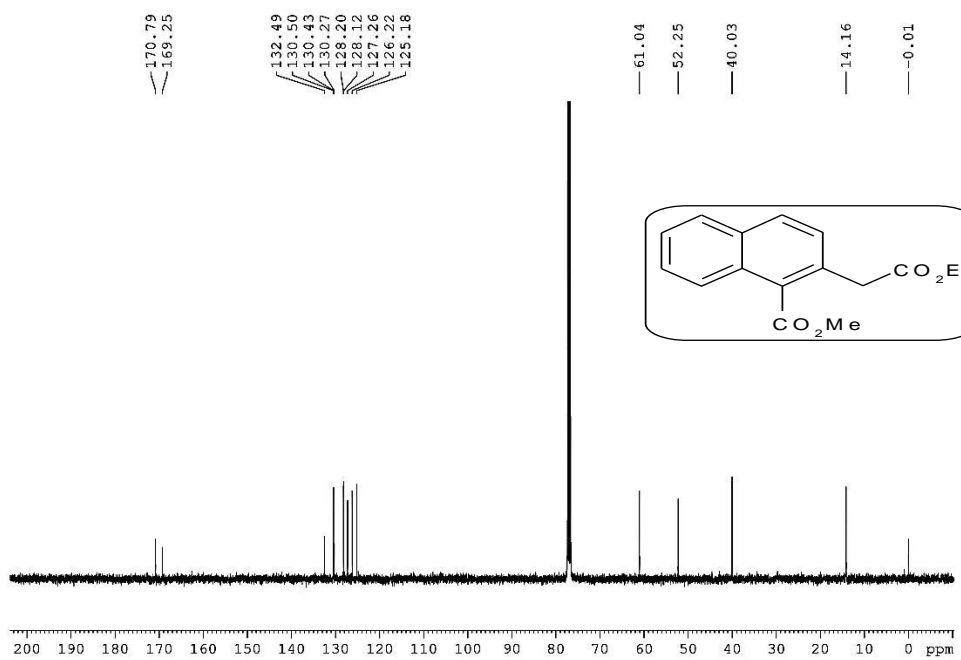

**Figure S64.** <sup>13</sup>C NMR spectrum of compound **3ah**

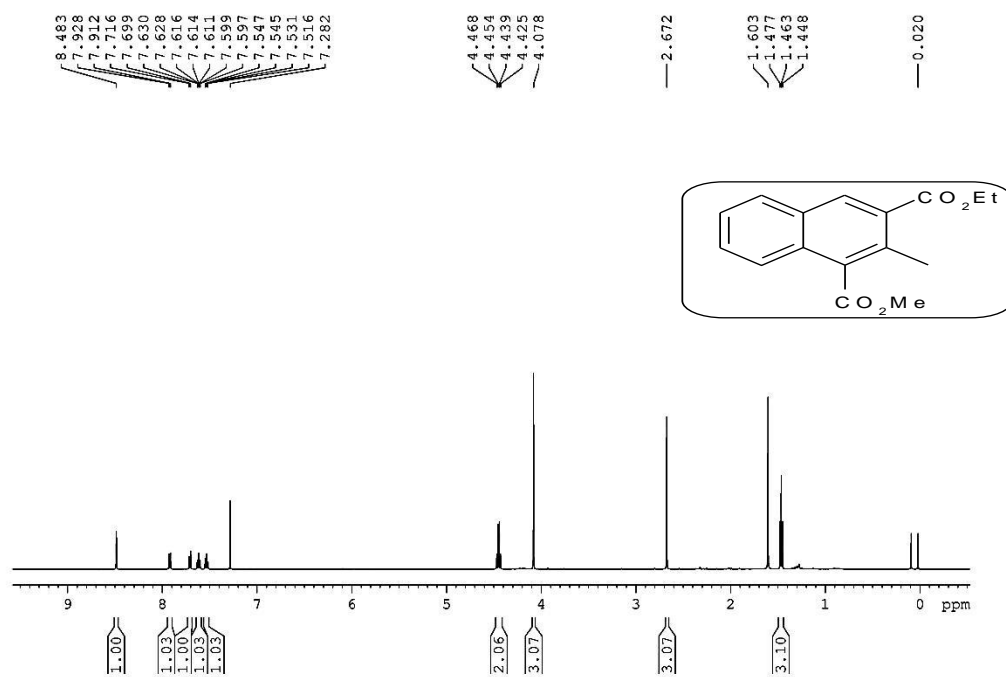

**Figure S65.** <sup>1</sup>H NMR spectrum of compound **4ah**

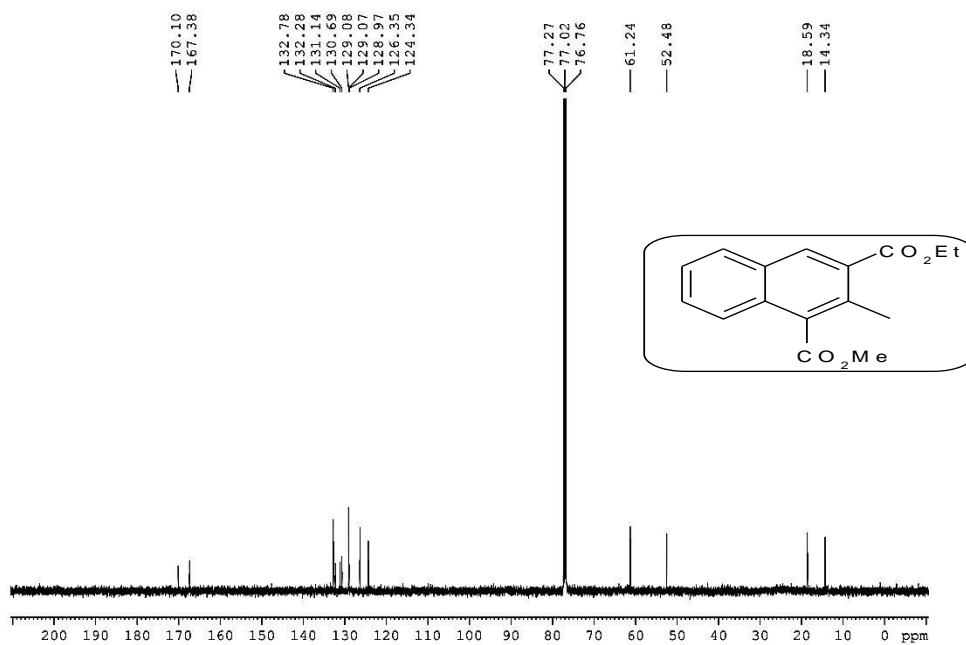

**Figure S66.** <sup>13</sup>C NMR spectrum of compound **4ah**

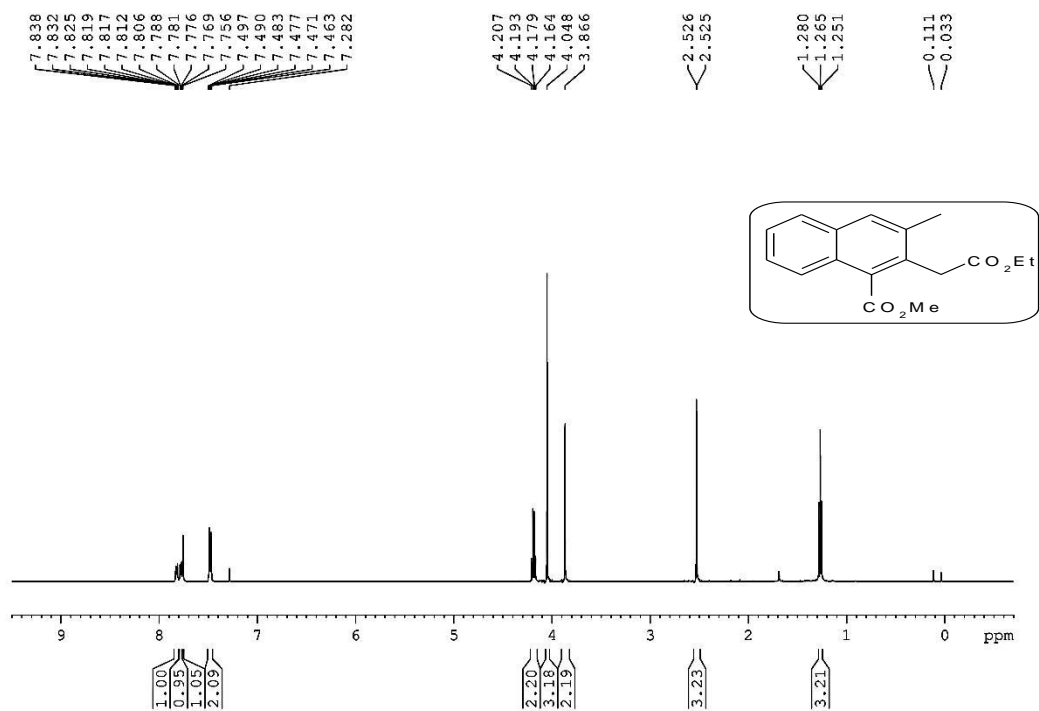

**Figure S67.** <sup>1</sup>H NMR spectrum of compound **3ai**

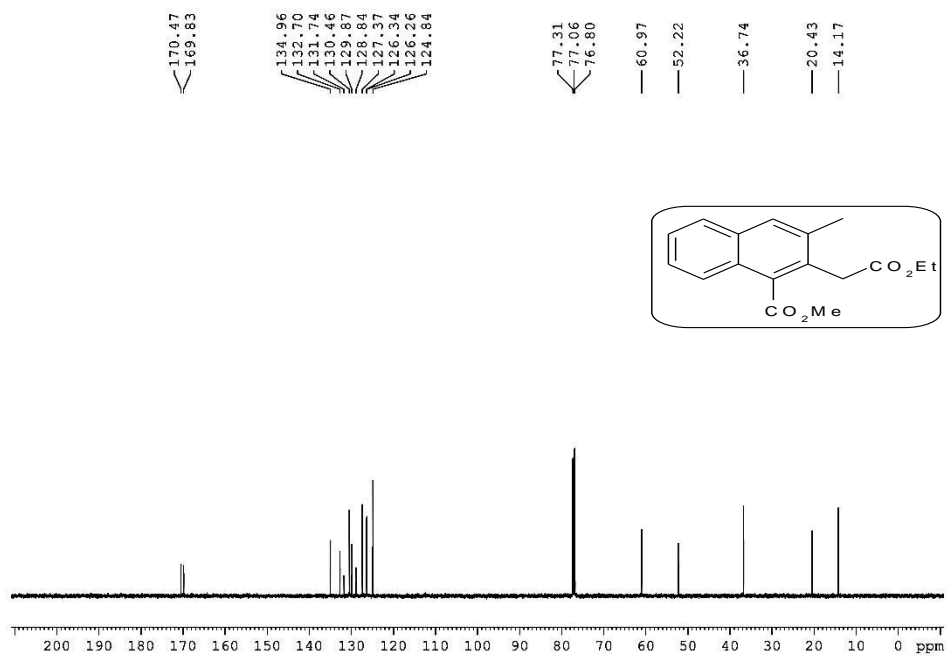

**Figure S68.** <sup>13</sup>C NMR spectrum of compound **3ai**

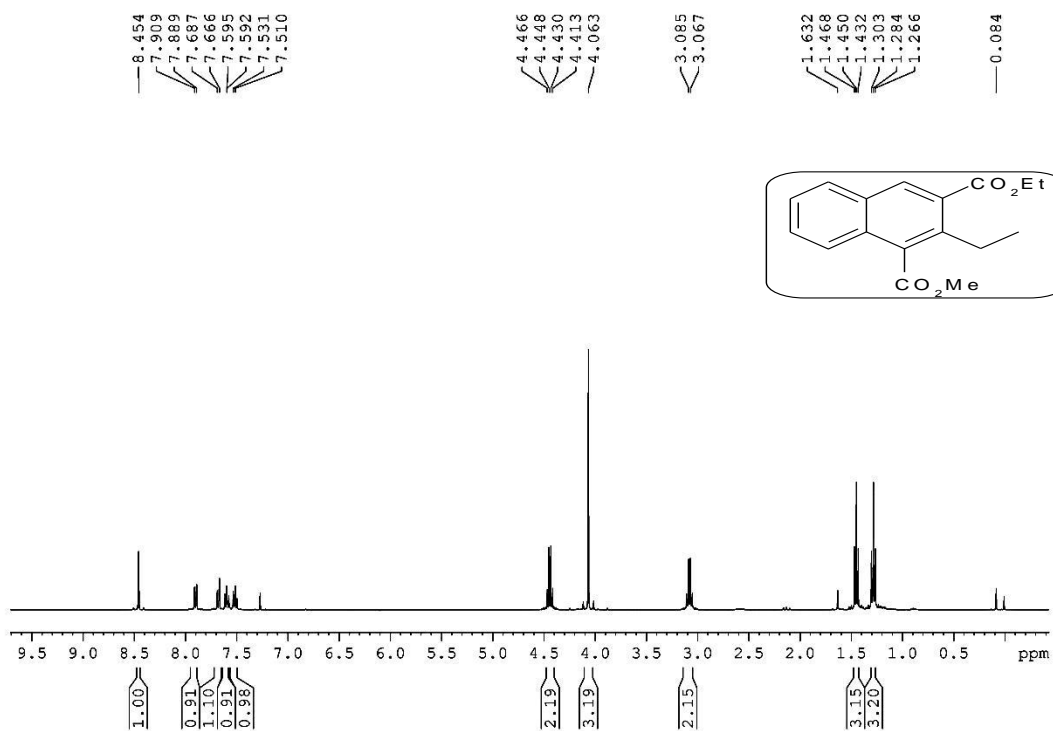

Figure S69.  $^1\text{H}$  NMR spectrum of compound **4ai**

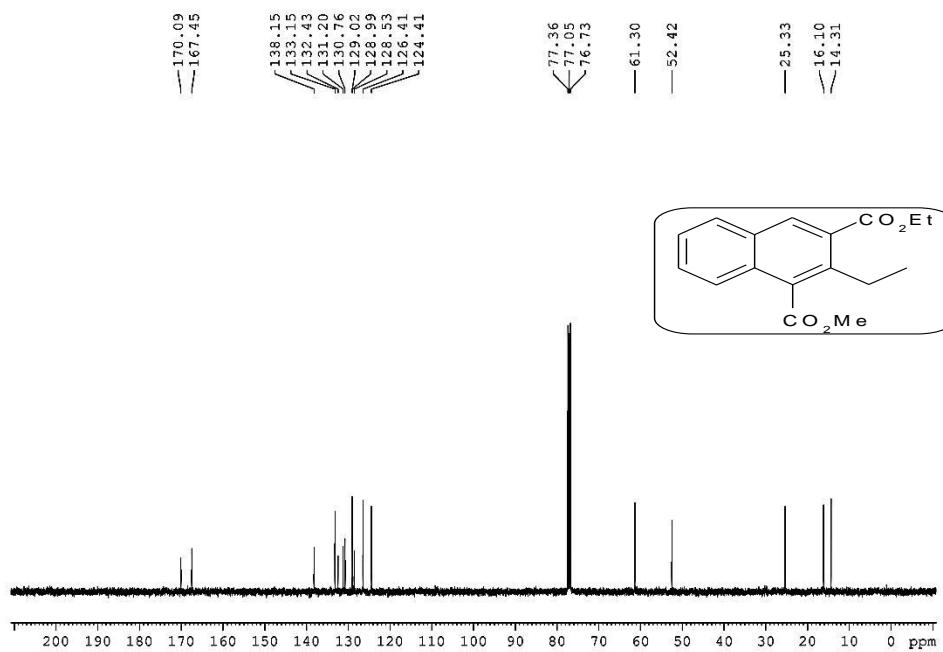

Figure S70.  $^{13}\text{C}$  NMR spectrum of compound **4ai**

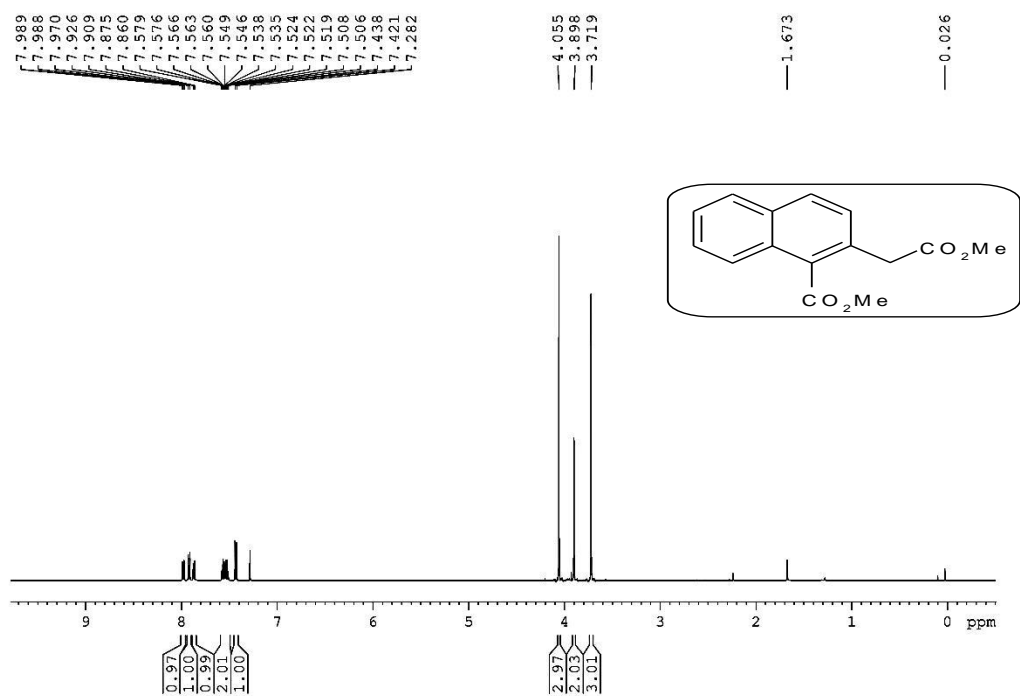

**Figure S71.**  $^1\text{H NMR}$  spectrum of compound **3aj**

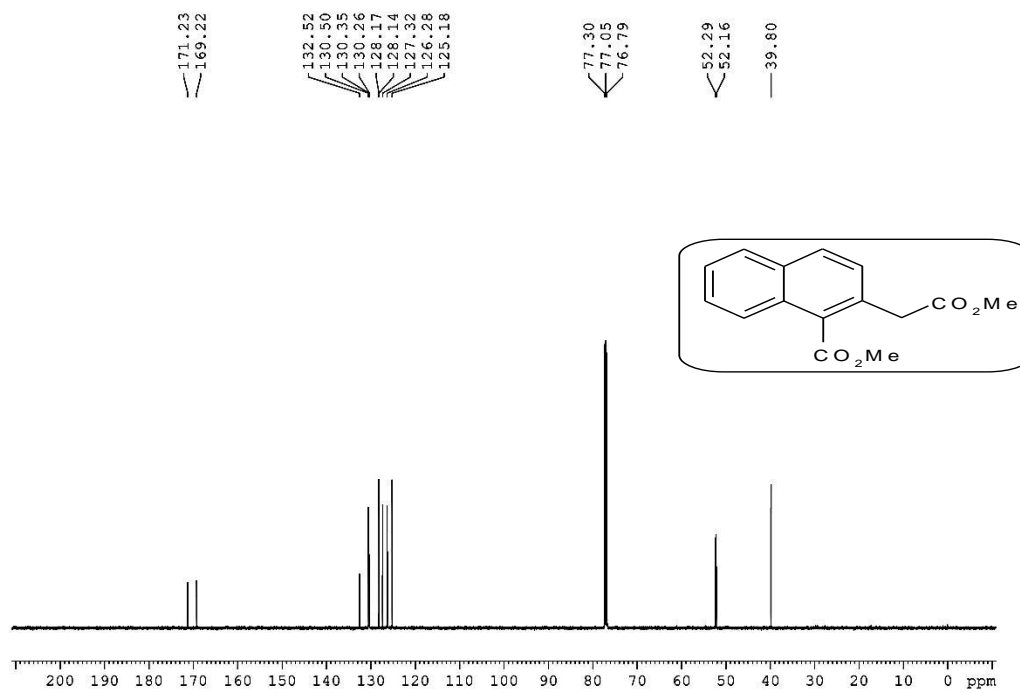

**Figure S72.**  $^{13}\text{C NMR}$  spectrum of compound **3aj**

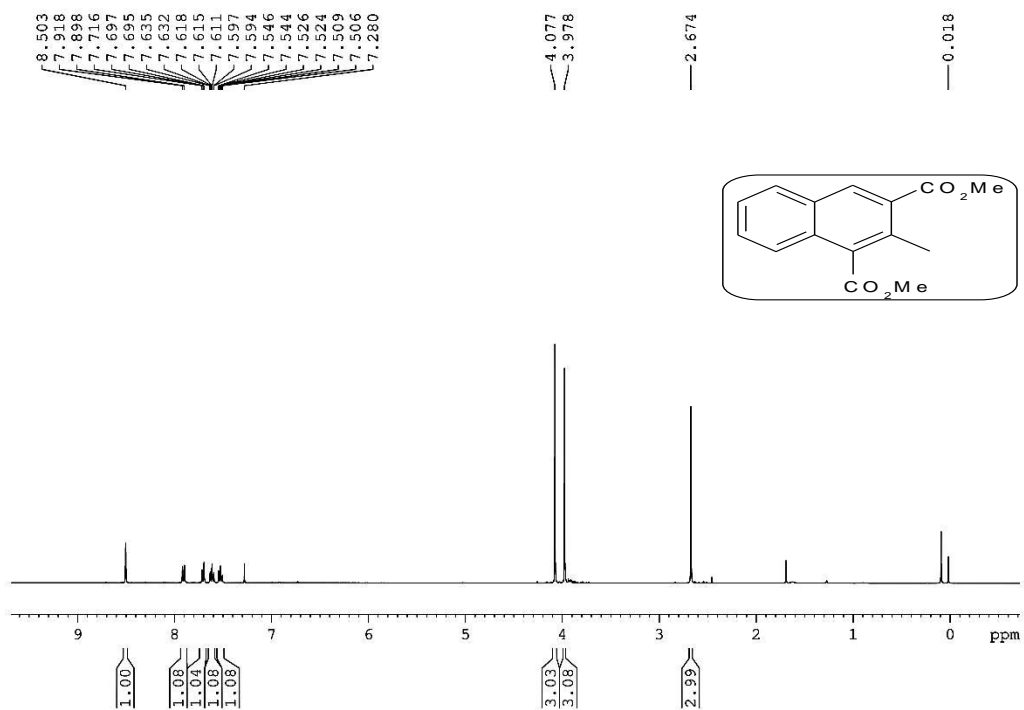

**Figure S73.** <sup>1</sup>H NMR spectrum of compound **4aj**

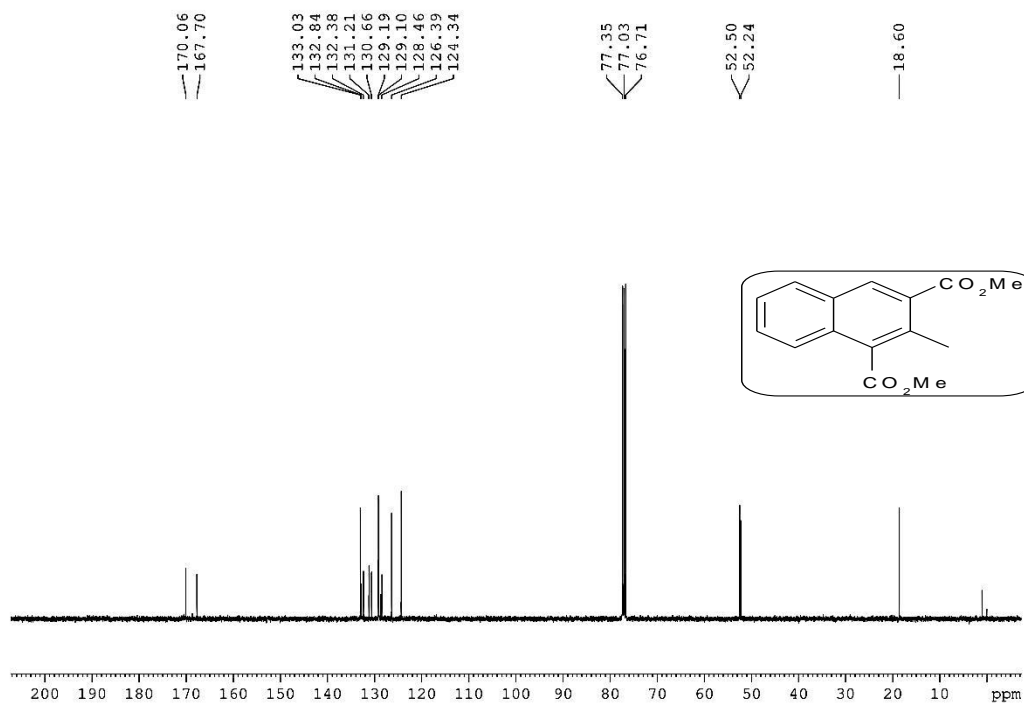

**Figure S74.** <sup>13</sup>C NMR spectrum of compound **4aj**

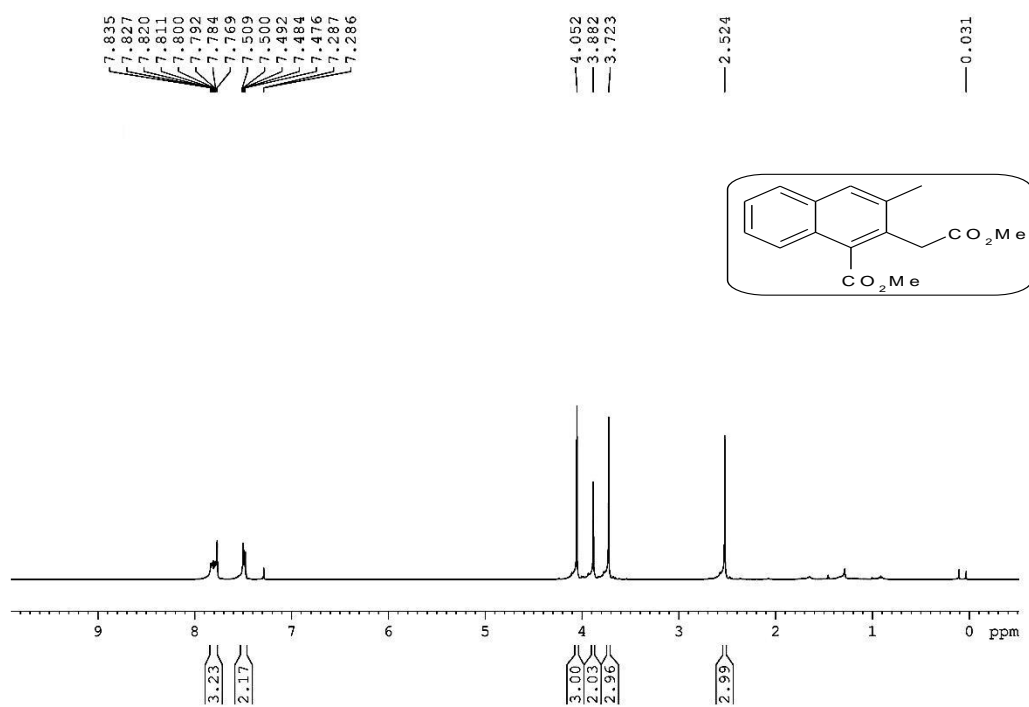

**Figure S75.**  $^1\text{H NMR}$  spectrum of compound **3ak**

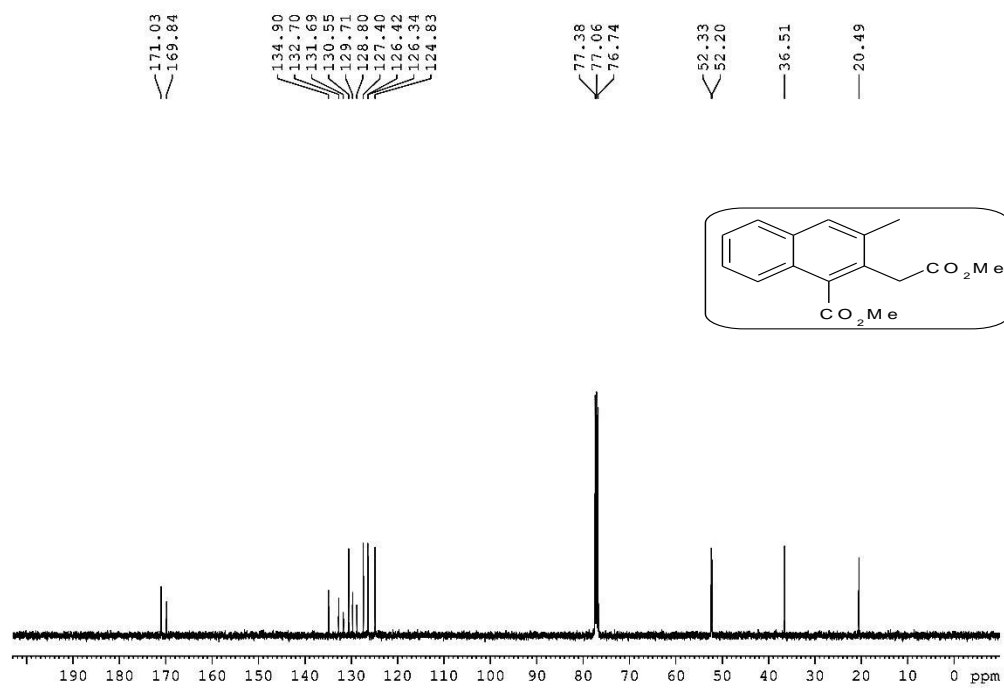

**Figure S76.**  $^{13}\text{C NMR}$  spectrum of compound **3ak**



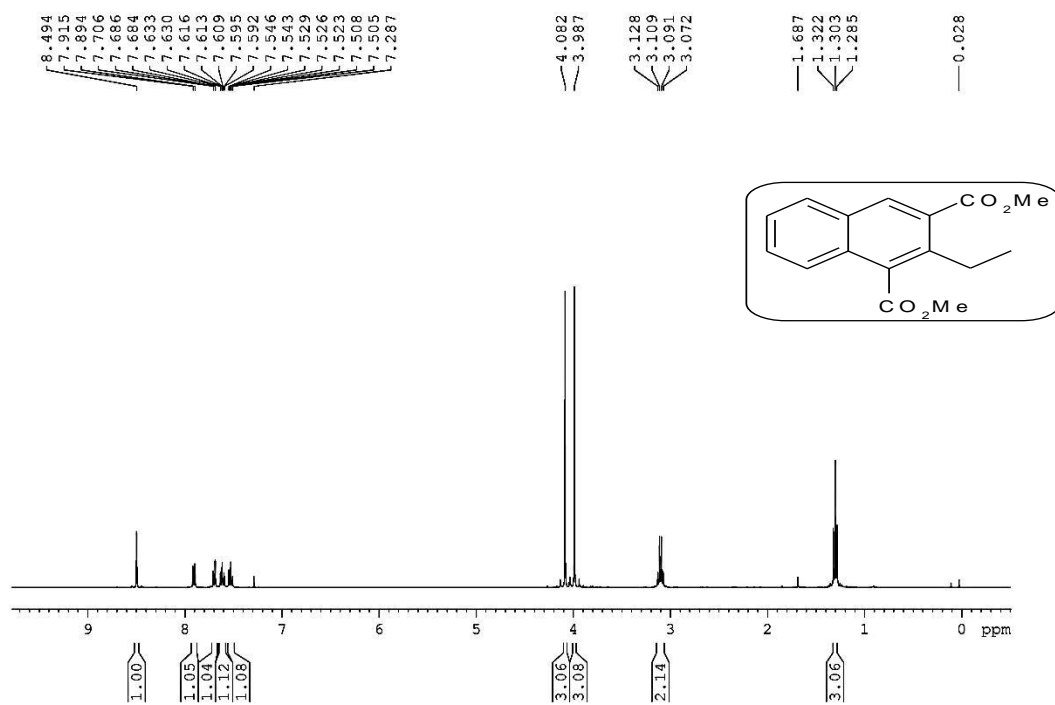

**Figure S77.**  $^1\text{H NMR}$  spectrum of compound **4ak**

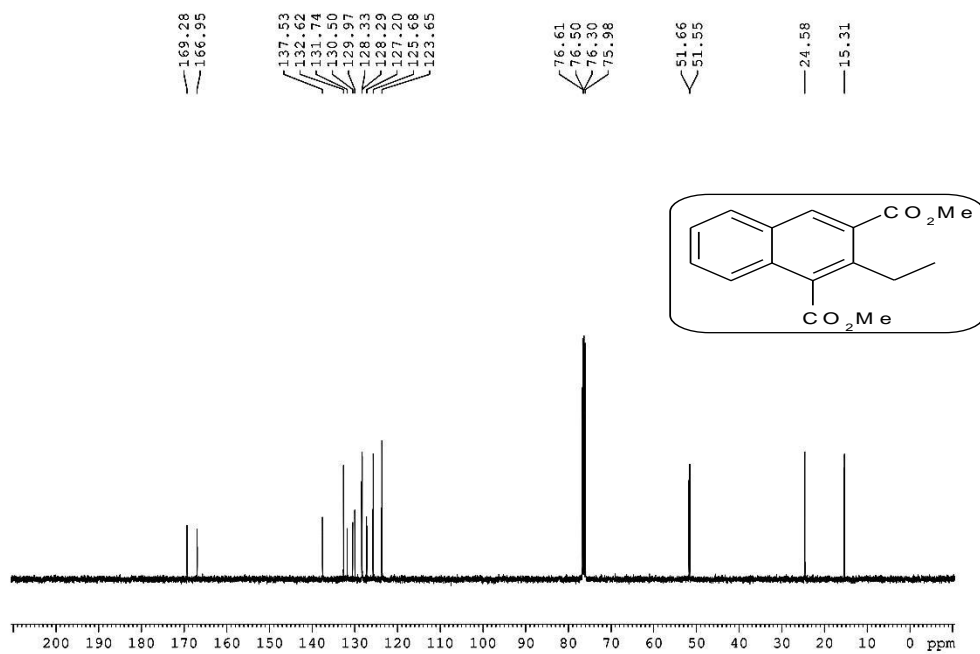

**Figure S78.**  $^{13}\text{C NMR}$  spectrum of compound **4ak**

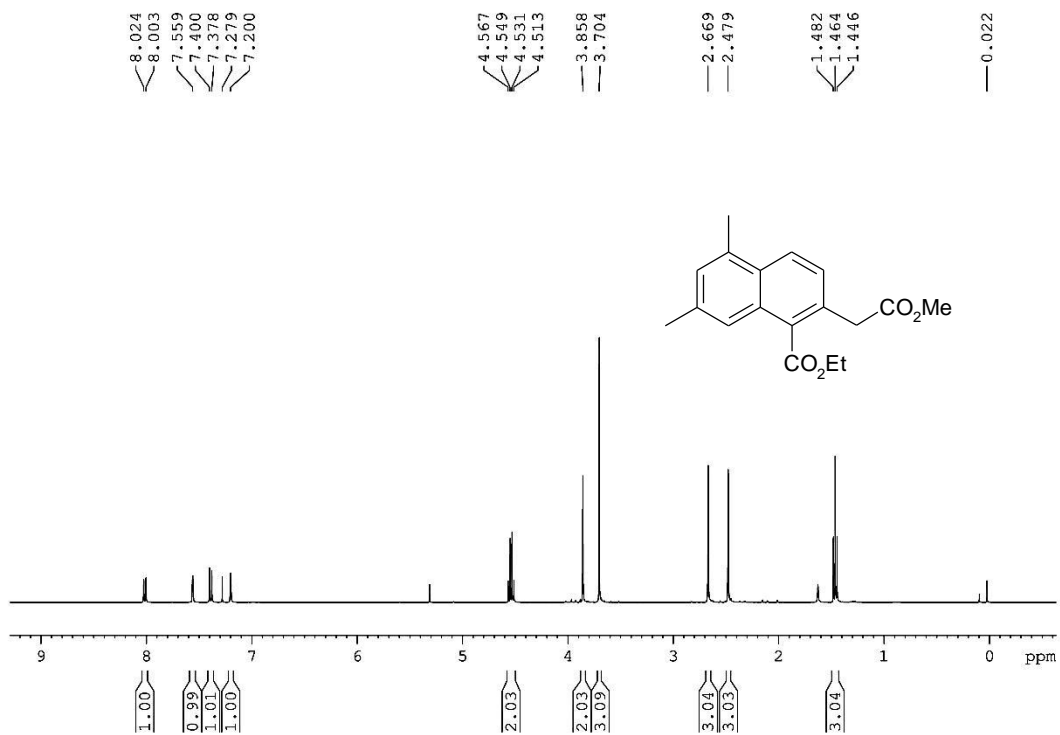

**Figure S79.** <sup>1</sup>H NMR spectrum of compound **3ij**

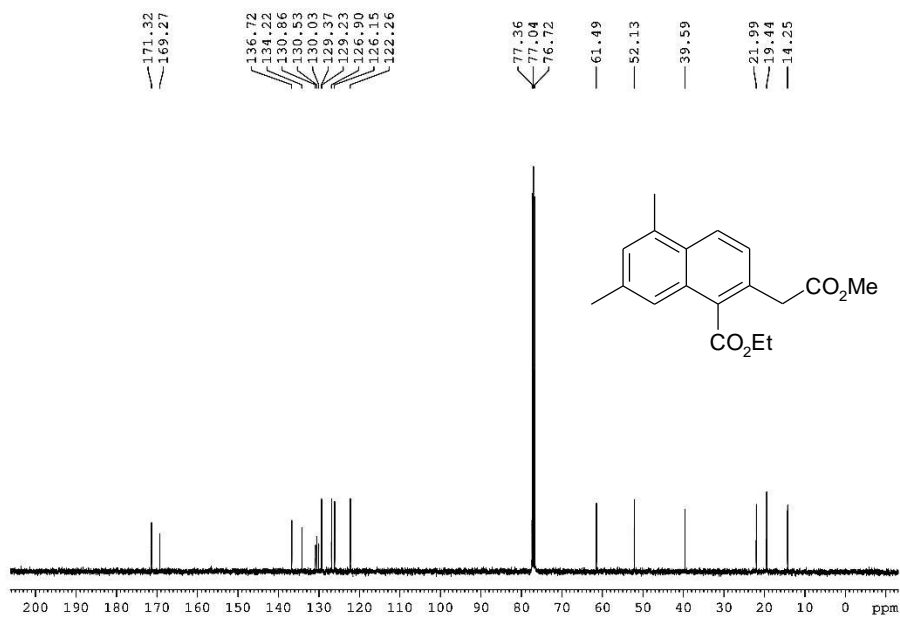

**Figure S80.** <sup>13</sup>C NMR spectrum of compound **3ij**

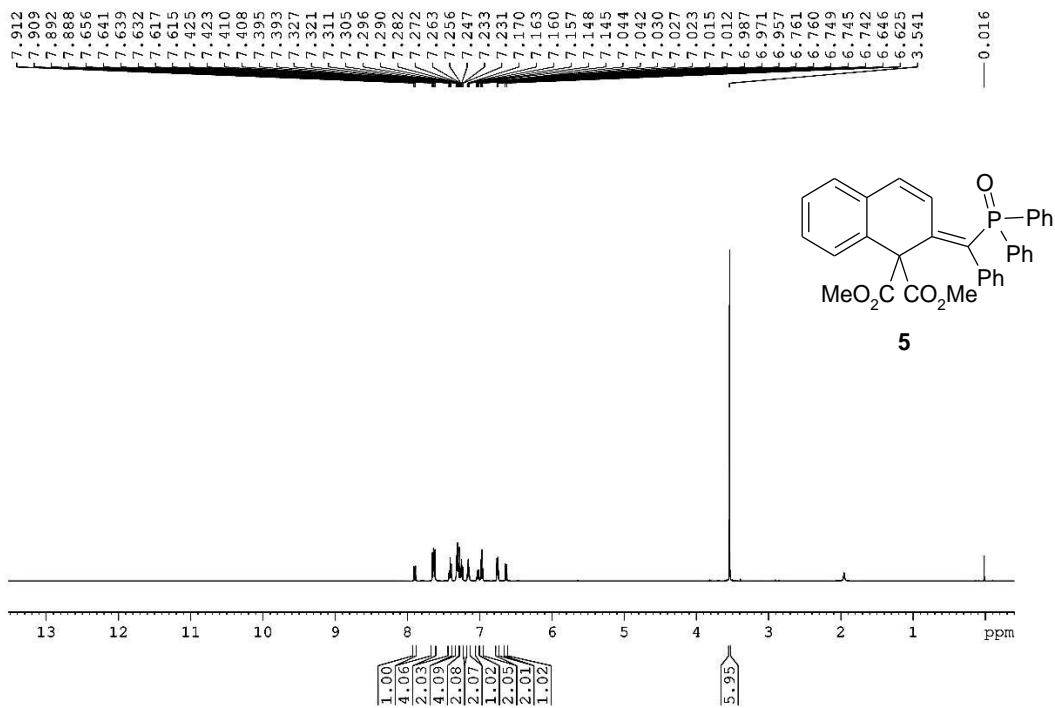

Figure S81. <sup>1</sup>H NMR spectrum of compound **5**

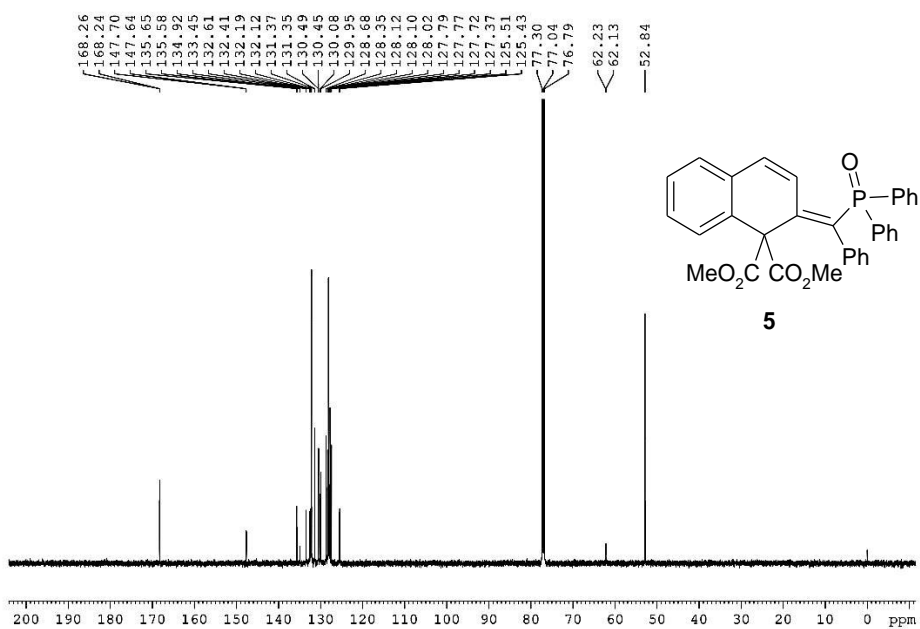

Figure S82. <sup>13</sup>C NMR spectrum of compound **5**

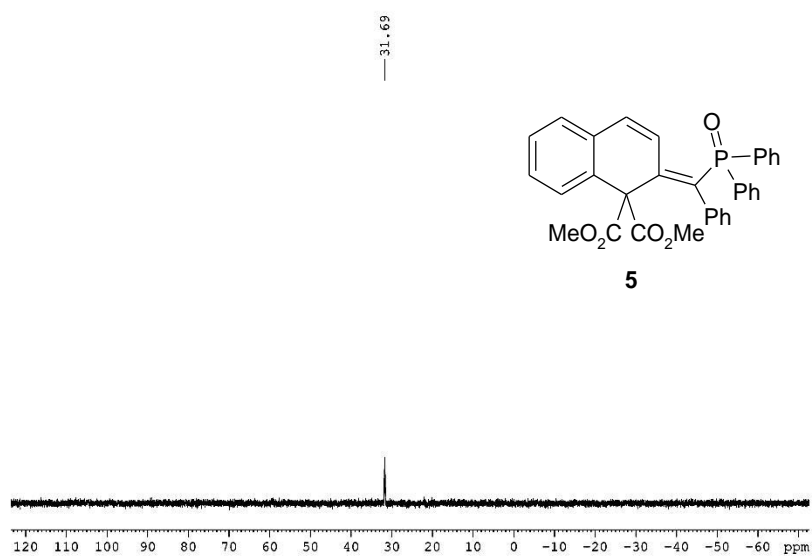

**Figure S83.**  $^{31}\text{P}$  NMR spectrum of compound **5**
